# Supplementary material
Source: PubMed Central journal article supplement (PMC4793613)
Supplement: pata019071.w1_default.pdf [file pata019071.w1_default.pdf]

## Online supplement to:

---

Randomised trials of human albumin for adults with sepsis:  
systematic review and meta-analysis with trial sequential  
analysis of all-cause mortality

---

**Amit Patel,<sup>1,2,3</sup> *Specialist Registrar & Clinical Lecturer***

**Michael A. Laffan,<sup>3</sup> *Professor & Consultant***

**Umeer Waheed,<sup>1</sup> *Consultant***

**Stephen J. Brett,<sup>1</sup> *Reader & Consultant***

***1 Centre for Perioperative Medicine and Critical Care Research, Imperial College Healthcare NHS Trust, Hammersmith Hospital, London, UK***

***2 MRC Clinical Sciences Centre, Hammersmith Hospital, Imperial College London, London, UK***

***3 Centre for Haematology, Hammersmith Hospital, Imperial College London, London, UK***

Dr Amit Patel

Centre for Perioperative Medicine and Critical Care Research

General Intensive Care Unit, Hammersmith Hospital, Imperial College Healthcare NHS Trust

Du Cane Road, London, W12 0HS, UK

T: (+44) 0208 383 4521

F: (+44) 0208 383 4142

E: amit.patel@imperial.ac.uk

## Contents of supplementary results

1. Risk of bias graph: reviewer judgements about each risk of bias domain
2. Funnel plots for the comparisons of human albumin with control, crystalloid, and colloid fluid
3. Characteristics of patients and albumin treatment
4. Sensitivity, bias and clinical subgroup, and meta-regression analyses for the comparisons of albumin with control fluid
5. Sensitivity, bias and clinical subgroup, and meta-regression analyses for the comparisons of albumin with crystalloid fluid
6. Sensitivity, bias and clinical subgroup, and meta-regression analyses for the comparisons of albumin with colloid fluid
7. Trial sequential analysis models with RASP or CRISTAL for human albumin compared to control fluid, with or without exclusion of studies at high risk of bias
8. Trial sequential analysis models with RASP or CRISTAL for human albumin compared to crystalloid, with or without exclusion of studies at high risk of bias
9. Forest plots and trial sequential analyses for the comparisons of human albumin compared to control fluid by sepsis subgroup, with or without exclusion of studies at high risk of bias
10. Forest plots and trial sequential analyses for the comparisons of human albumin compared to crystalloid fluid by sepsis subgroup, with or without exclusion of studies at high risk of bias
11. Forest plots for human albumin compared to colloid fluid by sepsis subgroup, with or without exclusion of studies at high risk of bias
12. References

## 1. Risk of bias graph: reviewer judgements about each risk of bias domain

Risk of bias summary displaying review authors' judgements about each risk of bias domain across all the included studies.

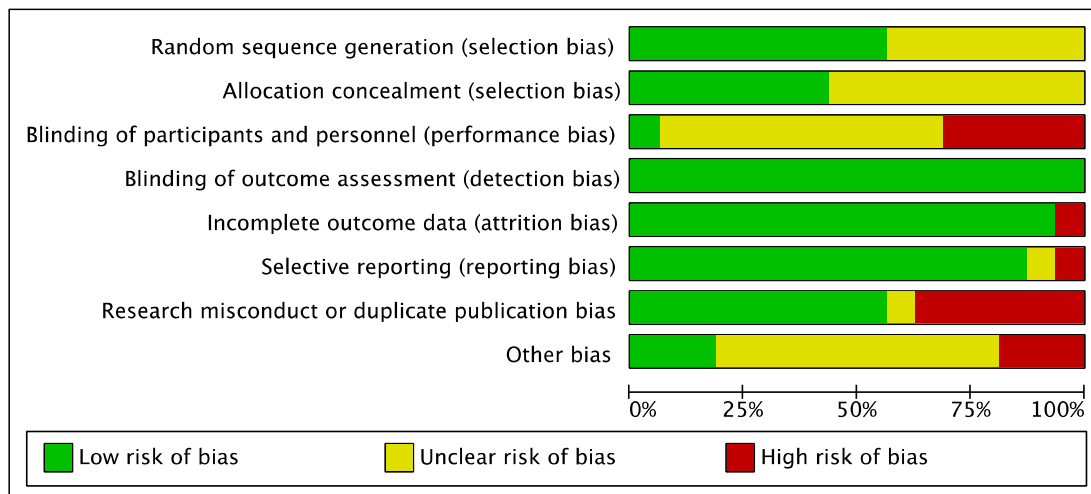

## 2. Funnel plots for the comparisons of human albumin with control, crystalloid, and colloid fluid

Funnel plot of studies reporting mortality of human albumin compared to control fluids. The relative risk (RR) and its standard error (SE) are plotted.

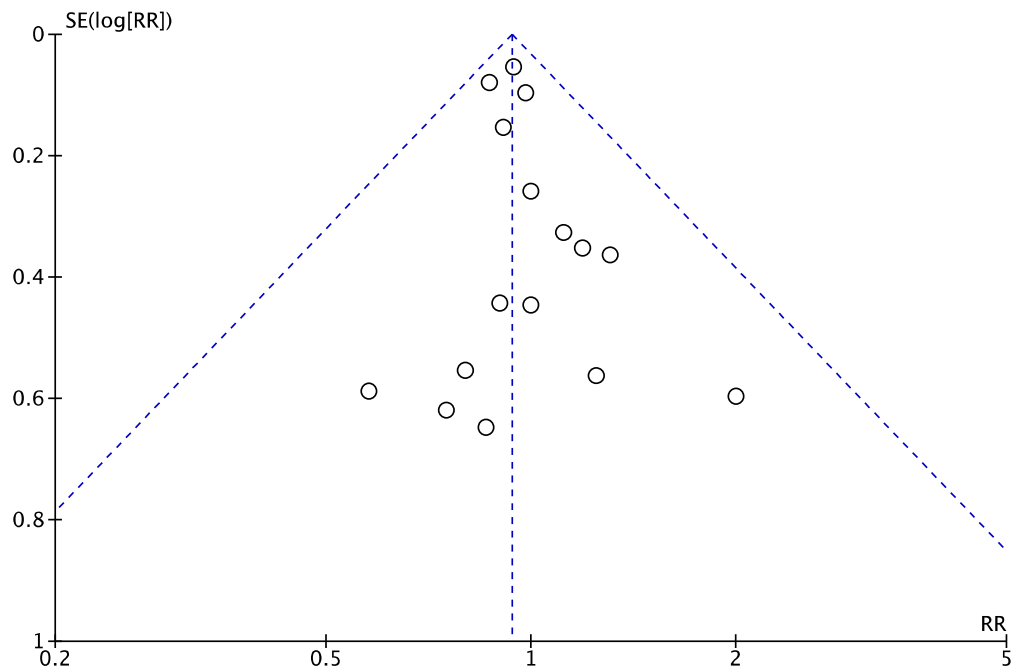

Funnel plot of studies reporting mortality of human albumin compared to crystalloid fluids. The relative risk (RR) and its standard error (SE) are plotted.

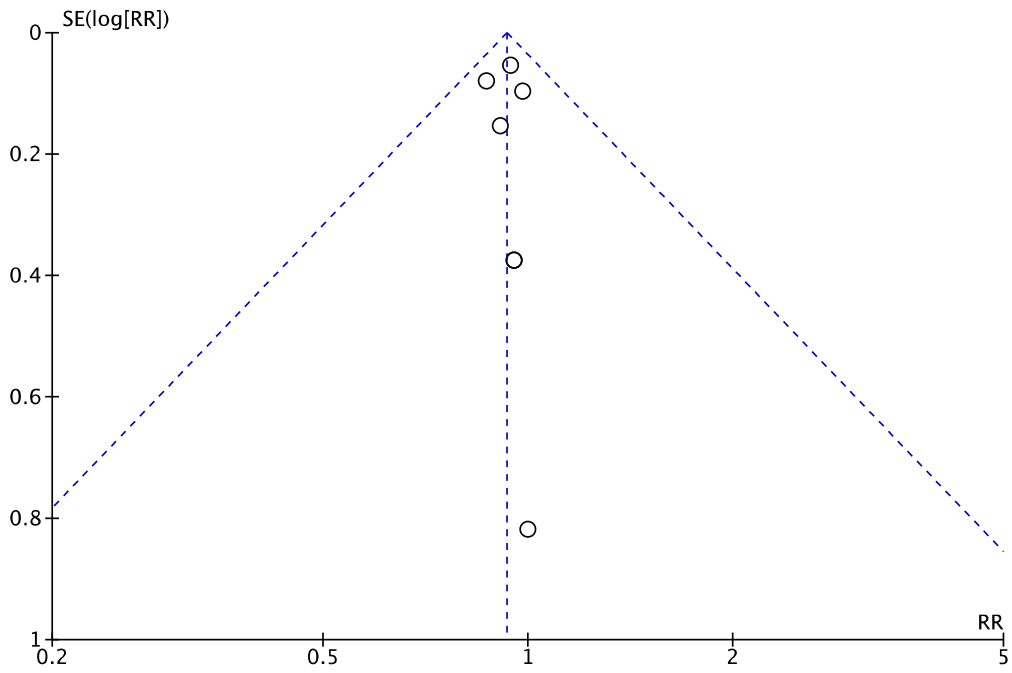

Funnel plot of studies reporting mortality of human albumin compared to colloid fluids. The relative risk (RR) and its standard error (SE) are plotted.

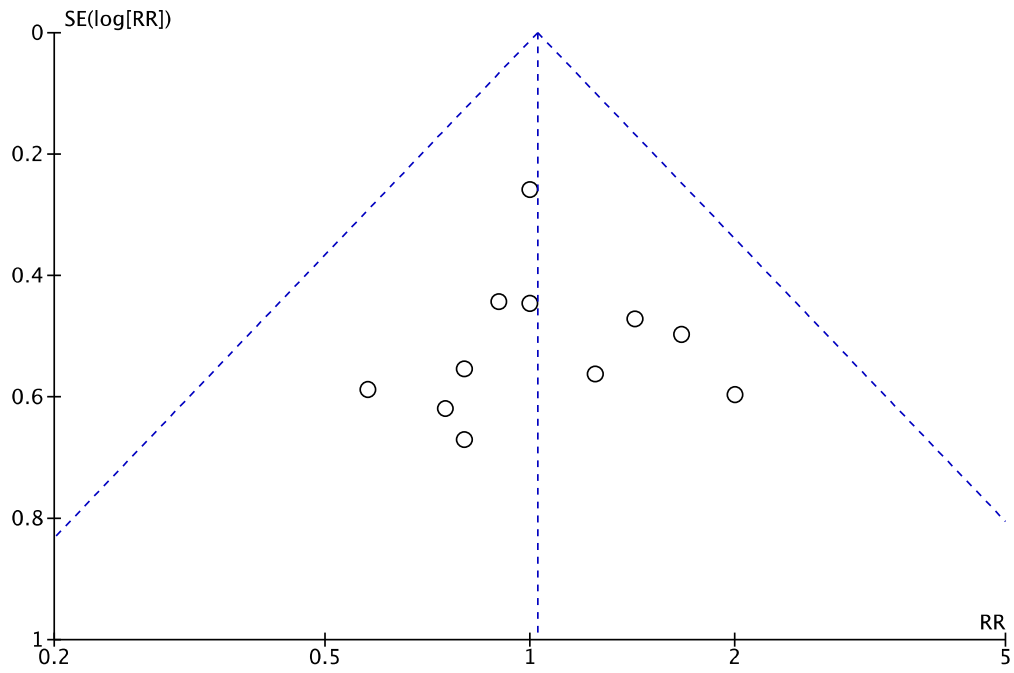

### 3. Characteristics of patients and albumin treatment

Characteristics of the sixteen randomised critical/intensive care studies included, reported in eighteen articles. The studies are presented alphabetically. Baseline patient characteristics of the albumin intervention group (or study population, @) are presented. Data are presented regarding albumin indication, therapeutic targets, total albumin dose administered, and post treatment albumin level. Abbreviations: Acute Physiology and Chronic Health Evaluation II (APACHE II); Sepsis-related Organ Failure Assessment (SOFA); Simplified Acute Physiology Score II (SAPS II); extravascular lung water (EVLW); acute respiratory distress syndrome (ARDS); colloid oncotic pressure (COP); cardiac index (CI); central venous pressure (CVP); pulmonary capillary wedge pressure (PCWP); pulmonary artery wedge pressure (PAWP); (ITBI); cardiac index (CI); base excess (BE); percentage saturation of mixed venous blood pulmonary artery blood (SvO<sub>2</sub>); relative risk reduction or increase (RRR(I)); absolute risk reduction or increase (ARR(I)); 95% confidence interval (95% CI); value unclearly or not reported (-); value estimated from a graph (~).

| Randomised clinical trial    | Primary study endpoint                                 | Baseline medical patients (%) | Mean (SD) or median [IQR]: SAPS II* / APACHE II§ / SOFA^ | Pulmonary site of infection (%) | Mechanical Ventilation (%) | Baseline ARDS (%) | Baseline RRT (%) | Albumin indication                                                   | Albumin targets                                  | Total albumin dose (g) | Total albumin volume (L) | Post-intervention albumin (g/L) (mean; SD) [median; IQR] | % RRR(I) / % ARR(I); (95% CI)                   |
|------------------------------|--------------------------------------------------------|-------------------------------|----------------------------------------------------------|---------------------------------|----------------------------|-------------------|------------------|----------------------------------------------------------------------|--------------------------------------------------|------------------------|--------------------------|----------------------------------------------------------|-------------------------------------------------|
| ALBIOS 2014[1]               | 28 day mortality                                       | 56.6                          | 48.0 [37-59]* / 8 [6-10]^                                | 38.8                            | 78.5                       | -                 | -                | Volume expansion and resuscitation with hypoalbuminaemia improvement | Early-goal directed therapy and albumin > 30 g/l | 220                    | 1.1                      | 29.4 (3.3) on day 7                                      | -5.8 (-15.5 to +5.1) / -2.5 (-7.0 to +2.1)      |
| Boldt, et al 1995[2]         | Coagulation parameters                                 | 0                             | 23.4 (3.2)§                                              | -                               | 100                        | 0                 | -                | Volume resuscitation                                                 | CVP and/or PCWP 12-16 mmHg                       | 350                    | 1.7                      | -                                                        | 0.0 (-39.7 to +65.9) / 0.0 (-33.7 to +33.7)     |
| Boldt, Heesen, et al 1996[3] | Cardio-respiratory and splanchnic perfusion parameters | 0                             | 24.0 (2.3)§                                              | -                               | 100                        | 0                 | -                | Volume expansion and resuscitation                                   | CVP and/or PCWP 10-15 mmHg                       | 422                    | 2.1                      | -                                                        | 25.0 (-58.5 to +276.6) / 6.7 (-26.0 to +39.4)   |
| Boldt, Müller et al 1996[4]  | Platelet function                                      | 0                             | 22.8 (3.2)§                                              | -                               | 100                        | 28.6 [severe]     | -                | Volume expansion and resuscitation                                   | CVP and/or PCWP 12-16 mmHg                       | 358                    | 1.8                      | -                                                        | -20.0 (-73.0 to +137.0) / -7.1 (-41.6 to +27.4) |
| Boldt, Muller et al 1996[5]  | Soluble adhesion molecule parameters                   | 0                             | 20.3 (13.2) §                                            | -                               | 100                        | -                 | -                | Volume expansion and resuscitation                                   | PAWP 12-18 mmHg                                  | 505                    | 2.5                      | -                                                        | 100.0 (-38.0 to +545.2) / 21.4 (-12.2 to +55.1) |



|                        |                                       |      |                                     |      |      |                          |      |                                                                      |                                                                 |       |       |              |                                                 |
|------------------------|---------------------------------------|------|-------------------------------------|------|------|--------------------------|------|----------------------------------------------------------------------|-----------------------------------------------------------------|-------|-------|--------------|-------------------------------------------------|
| Dolecek et al 2009[6]  | EVLW change                           | 0    | 8.0 (2)^                            | 66.7 | 100  | 0                        | 0    | Volume expansion and resuscitation                                   | Normal ITBI (>850 mL/m-2) and cardiac index (CI >3.5 L/min/m-2) | 120   | 0.6   | 29.5 (5.9)   | -42.2 (-81.7 to +82.7) / -9.7 (-30.0 to +10.5)  |
| EARSS 2011[7]          | 28 day mortality                      | 73.7 | 51.0 [44-66]*                       | 43.6 | 82.0 | -                        | 22.6 | Volume expansion and resuscitation with hypoalbuminaemia improvement | Early-goal directed therapy and albumin > 25 g/l                | 180   | 0.9   | ~28 on day 3 | -1.5 (-18.6 to +19.2) / 0.5 (-7.2 to +6.1)      |
| Friedman et al 2008[8] | Haemodynamic parameters               | -    | -                                   | -    | 100  | 100 [moderate]           | -    | Volume expansion and resuscitation                                   | Physician discretion                                            | 16    | 0.4   | -            | -10.0 (-62.2 to +114.5) / -3.7 (-33.7 to +26.3) |
| Haupt et al 1982[9]    | COP change                            | -    | Pre-SAPS, APA, CHE, SOF, A scorin g | -    | -    | -                        | -    | Volume expansion and resuscitation                                   | PAWP 10-15 mmHg                                                 | 155 @ | 3.1 @ | -            | 19.0 (-40.3 to +137.3) / 11.4 (-33.8 to +56.6)  |
| Metildi et al 1984[10] | Intra-pulmonary shunt fraction change | -    | Pre-SAPS, APA, CHE, SOF, A scorin g | 33.3 | 100  | 100 [moderate to severe] | -    | Volume expansion and resuscitation                                   | Normal arterial pH, BE, SvO2                                    | 170 @ | 3.4 @ | -            | -9.1 (-33.0 to +23.3) / -8.3 (-34.6 to +17.9)   |

|                                                      |                                               |        |                                    |      |        |                          |     |                                                            |                                      |       |       |               |                                                  |
|------------------------------------------------------|-----------------------------------------------|--------|------------------------------------|------|--------|--------------------------|-----|------------------------------------------------------------|--------------------------------------|-------|-------|---------------|--------------------------------------------------|
| Palumbo et al 2006[11]                               | Unclear                                       | 45.0 @ | g<br>19.7 (2.7)§                   | -    | 100    | -                        | -   | Volume expansion and resuscitation                         | PAWP 15-18 mmHg                      | -     | -     | -             | -25.0 (-77.7 to +152.4) / -10.0 (-51.6 to +31.6) |
| Rackow et al 1983[12]                                | COP change, pulmonary oedema                  | -      | Pre-SAPS, APA, CHE, SOF A scorin g | -    | -      | -                        | -   | Volume expansion and resuscitation                         | PAWP 15 mmHg                         | 141 @ | 2.8 @ | -             | 31.0 (-35.9 to +167.6 / 16.9 (-27.7 to 61.4)     |
| Rackow et al 1989[13]                                | Cardio-respiratory and coagulation parameters | -      | Pre-SAPS, SOF A scorin g           | 50.0 | 60.0   | -                        | -   | Volume expansion and resuscitation                         | PAWP >15 mmHg or 2 L infused         | 49    | 1     | -             | 0.0 (-58.4 to +140.3) / 0.0 (-43.8 to +43.8)     |
| SAFE 2004[14] & 2011[15]                             | 28 day mortality                              | 78.1   | 21.6 (7.8)§                        | 44.1 | 56.8   | 6.5 [moderate to severe] | 3.8 | Volume expansion and resuscitation with maintenance in ICU | Physician discretion                 | 95    | 2.4   | ~≥25 on day 7 | -13.0 (-26.0 to +2.1) / -4.6 (-9.9 to +0.7)      |
| van der Heijden et al 2009[16] & Trof et al 2010[17] | EVLW change; COP, CI changes                  | -      | 16.0 (2)§                          | 50.0 | 100    | 75@ [mild]               | -   | Volume expansion and resuscitation                         | CVP-guided fluid loading             | 300   | 1.5   | 27 (3)        | -14.3 (-76.0 to +205.6 / -5.6 (-49.5 to +38.4)   |
| Veneman et al 2004[18]                               | COP                                           | -      | 22.0 (8)§ @                        | -    | 50.0 @ | -                        | -   | Volume expansion and resuscitation with hypoalbuminaemia   | Haemodynamic and clinical parameters | 180   | 0.9   | -             | 11.6 (-41.1 to +111.5) / 6.5 (-32.3 to +45.3)    |

improvement

#### 4. Sensitivity, bias and clinical subgroup, and meta-regression analyses for the comparisons of albumin with control fluid

Predefined sensitivity, bias and clinical subgroup, and meta-regression analyses for the comparisons of albumin with control fluid.

Abbreviations: not applicable (NA); Surviving Sepsis Campaign launch (SSC).[\[19 20\]](#)

| Human albumin compared to control fluid |                             |                                        |          |                |                         |         |                     |                             |                     |                             |
|-----------------------------------------|-----------------------------|----------------------------------------|----------|----------------|-------------------------|---------|---------------------|-----------------------------|---------------------|-----------------------------|
| Sensitivity analysis                    |                             | Measures of effects size and precision |          |                |                         |         | Group heterogeneity |                             | Subgroup difference |                             |
| Category                                | Group or subgroup           | Studies                                | Patients | Point estimate | 95% confidence interval | P value | I <sup>2</sup>      | Chi <sup>2</sup><br>P value | I <sup>2</sup>      | Chi <sup>2</sup><br>P value |
| Fixed effects model with relative risk  | All studies                 | 16                                     | 4190     | 0.94           | 0.87 to 1.01            | 0.09    | 0                   | 0.99                        | 27.1                | 0.24                        |
|                                         | Low or unclear risk of bias | 6                                      | 3942     | 0.93           | 0.85 to 1.00            | 0.06    | 0                   | 0.88                        | NA                  | NA                          |
|                                         | High risk of bias           | 10                                     | 248      | 1.02           | 0.83 to 1.24            | 0.86    | 0                   | 0.95                        | NA                  | NA                          |
| Fixed effects model with odds ratio     | All studies                 | 16                                     | 4190     | 0.90           | 0.79 to 1.02            | 0.09    | 0                   | 0.99                        | 0                   | 0.32                        |
|                                         | Low or unclear risk of bias | 6                                      | 3942     | 0.88           | 0.78 to 1.01            | 0.06    | 0                   | 0.90                        | NA                  | NA                          |
|                                         | High risk of bias           | 10                                     | 248      | 1.18           | 0.68 to 2.03            | 0.56    | 0                   | 0.97                        | NA                  | NA                          |
| Random effects model with odds ratio    | All studies                 | 16                                     | 4190     | 0.90           | 0.79 to 1.02            | 0.09    | 0                   | 0.99                        | 0                   | 0.32                        |

|                                              |                                                                                                    |           |         |          |                |                         |                            |                |                            |                |
|----------------------------------------------|----------------------------------------------------------------------------------------------------|-----------|---------|----------|----------------|-------------------------|----------------------------|----------------|----------------------------|----------------|
| Trial exclusion: largest[1]                  | Low or unclear risk of bias                                                                        | 6         | 3942    | 0.88     | 0.78 to 1.01   | 0.06                    | 0                          | 0.90           | NA                         | NA             |
|                                              | High risk of bias                                                                                  | 10        | 248     | 1.17     | 0.67 to 2.05   | 0.57                    | 0                          | 0.97           | NA                         | NA             |
|                                              | All studies                                                                                        | 15        | 2380    | 0.94     | 0.85 to 1.05   | 0.22                    | 0                          | 0.98           | 0                          | 0.35           |
| Trial exclusion: greatest weight[1]          | Low or unclear risk of bias                                                                        | 5         | 2132    | 0.91     | 0.81 to 1.03   | 0.13                    | 0                          | 0.81           | NA                         | NA             |
|                                              | High risk of bias                                                                                  | 10        | 248     | 1.02     | 0.83 to 1.24   | 0.86                    | 0                          | 0.95           | NA                         | NA             |
|                                              | All studies                                                                                        | 15        | 2380    | 0.94     | 0.85 to 1.05   | 0.22                    | 0                          | 0.98           | 0                          | 0.35           |
| Trial exclusion: greatest observed[14<br>15] | Low or unclear risk of bias                                                                        | 5         | 2132    | 0.91     | 0.81 to 1.03   | 0.13                    | 0                          | 0.81           | NA                         | NA             |
|                                              | High risk of bias                                                                                  | 10        | 248     | 1.02     | 0.83 to 1.24   | 0.86                    | 0                          | 0.95           | NA                         | NA             |
|                                              | All studies                                                                                        | 15        | 2972    | 0.96     | 0.88 to 1.05   | 0.35                    | 0                          | 0.99           | 0                          | 0.53           |
| <b>Subgroup analysis</b>                     | <b>Relative risk effect size measure with random effects model (Mantel-Haenszel) and precision</b> |           |         |          |                |                         | <b>Group heterogeneity</b> |                | <b>Subgroup difference</b> |                |
|                                              | Category                                                                                           | Subgroups | Studies | Patients | Point estimate | 95% confidence interval | P value                    | I <sup>2</sup> | Chi <sup>2</sup> P value   | I <sup>2</sup> |
| Selection bias                               | Low or unclear risk                                                                                | 16        | 4190    | 0.94     | 0.94 to 1.01   | 0.11                    | 0                          | 0.99           | NA                         | NA             |
|                                              | High risk                                                                                          | 0         | 0       | NA       | NA             | NA                      | NA                         | NA             | NA                         | NA             |
| Performance bias                             | Low or unclear risk                                                                                | 11        | 4091    | 0.94     | 0.87 to 1.01   | 0.10                    | 0                          | 0.94           | 0                          | 0.88           |
|                                              | High risk                                                                                          | 5         | 99      | 0.98     | 0.77 to 1.25   | 0.88                    | 0                          | 0.84           | NA                         | NA             |
| Detection bias                               | Low or unclear risk                                                                                | 16        | 4190    | 0.94     | 0.94 to 1.01   | 0.11                    | 0                          | 0.99           | NA                         | NA             |
|                                              | High risk                                                                                          | 0         | 0       | NA       | NA             | NA                      | NA                         | NA             | NA                         | NA             |
| Attrition bias                               | Low or unclear risk                                                                                | 15        | 4157    | 0.94     | 0.87 to 1.01   | 0.10                    | 0                          | 0.98           | 0                          | 0.60           |
|                                              | High risk                                                                                          | 1         | 33      | 1.12     | 0.59 to 2.12   | 0.74                    | NA                         | NA             | NA                         | NA             |
| Reporting bias                               | Low or unclear risk                                                                                | 15        | 4157    | 0.94     | 0.87 to 1.01   | 0.10                    | 0                          | 0.98           | 0                          | 0.60           |
|                                              | High risk                                                                                          | 1         | 33      | 1.12     | 0.59 to 2.12   | 0.74                    | NA                         | NA             | NA                         | NA             |
| Research misconduct or duplication           | Low or unclear risk                                                                                | 10        | 4039    | 0.93     | 0.86 to 1.00   | 0.06                    | 0                          | 0.99           | 38.6                       | 0.20           |

|                                                                    |                                   |    |      |      |              |      |    |      |    |      |
|--------------------------------------------------------------------|-----------------------------------|----|------|------|--------------|------|----|------|----|------|
| publication bias                                                   |                                   |    |      |      |              |      |    |      |    |      |
|                                                                    | High risk                         | 6  | 151  | 1.14 | 0.84 to 1.56 | 0.40 | 0  | 0.88 | NA | NA   |
| Other bias                                                         | Low or unclear risk               | 13 | 4102 | 0.94 | 0.87 to 1.01 | 0.10 | 0  | 0.95 | 0  | 0.78 |
|                                                                    | High risk                         | 3  | 88   | 1.00 | 0.65 to 1.53 | 1.00 | 0  | 0.85 | NA | NA   |
| Data source bias                                                   | Conferences                       | 2  | 2602 | 0.95 | 0.87 to 1.05 | 0.32 | 0  | 0.69 | 0  | 0.65 |
|                                                                    | Journal articles                  | 14 | 1588 | 0.94 | 0.87 to 1.01 | 0.18 | 0  | 0.97 | NA | NA   |
| Author bias                                                        | Boldt et al                       | 4  | 116  | 1.08 | 0.73 to 1.61 | 0.70 | 0  | 0.67 | 0  | 0.48 |
|                                                                    | Other authors                     | 12 | 4074 | 0.94 | 0.87 to 1.01 | 0.09 | 0  | 0.98 | NA | NA   |
| Location bias                                                      | Europe                            | 11 | 2893 | 0.96 | 0.87 to 1.05 | 0.34 | 0  | 0.98 | 0  | 0.54 |
|                                                                    | North America                     | 4  | 79   | 0.99 | 0.77 to 1.27 | 0.95 | 0  | 0.71 | NA | NA   |
|                                                                    | Australasia                       | 1  | 1218 | 0.87 | 0.74 to 1.02 | 0.09 | NA | NA   | NA | NA   |
| Small study bias                                                   | Multicentre                       | 3  | 3820 | 0.93 | 0.86 to 1.02 | 0.08 | 0  | 0.58 | 0  | 0.54 |
|                                                                    | Single centre                     | 13 | 370  | 0.99 | 0.82 to 1.20 | 0.94 | 0  | 0.98 | NA | NA   |
| Time bias                                                          | Post-SSC                          | 6  | 2744 | 0.95 | 0.86 to 1.04 | 0.25 | 0  | 0.96 | 0  | 0.79 |
|                                                                    | Pre-SSC                           | 10 | 1446 | 0.93 | 0.82 to 1.05 | 0.24 | 0  | 0.87 | NA | NA   |
| Disease severity (sepsis versus severe sepsis and/or septic shock) | Severe sepsis and/or septic shock | 11 | 3854 | 0.94 | 0.87 to 1.01 | 0.09 | 0  | 0.96 | 0  | 0.55 |
|                                                                    | Sepsis                            | 5  | 336  | 1.15 | 0.73 to 1.51 | 0.80 | 0  | 0.79 | NA | NA   |
| Disease severity (sepsis versus severe sepsis versus septic shock) | All studies                       | 16 | 4190 | 0.94 | 0.87 to 1.01 | 0.08 | 0  | 0.88 | 0  | 0.76 |
|                                                                    | Septic shock                      | 4  | 1962 | 0.92 | 0.83 to 1.02 | 0.10 | 0  | 0.45 | NA | NA   |
|                                                                    | Severe sepsis                     | 8  | 2070 | 0.95 | 0.85 to 1.06 | 0.35 | 0  | 0.67 | NA | NA   |
|                                                                    | Sepsis                            | 5  | 336  | 1.15 | 0.73 to 1.51 | 0.80 | 0  | 0.79 | NA | NA   |
| Intervention method                                                | Predefined                        | 4  | 2691 | 0.95 | 0.87 to 1.05 | 0.31 | 0  | 0.77 | 0  | 0.64 |
|                                                                    | Variable                          | 16 | 1499 | 0.92 | 0.81 to 1.04 | 0.18 | 0  | 0.96 | NA | NA   |
| Intervention type                                                  | Hypooncotic (4-5% albumin)        | 7  | 1363 | 0.90 | 0.79 to 1.03 | 0.13 | 0  | 0.92 | 0  | 0.47 |
|                                                                    | Hyperoncotic (20% albumin)        | 9  | 2827 | 0.96 | 0.87 to 1.05 | 0.35 | 0  | 0.92 | NA | NA   |

|                                    |                            |                                                                                                                |          |                |                         |         |                  |      |    |      |
|------------------------------------|----------------------------|----------------------------------------------------------------------------------------------------------------|----------|----------------|-------------------------|---------|------------------|------|----|------|
| Intervention timing                | Early (<24 hours)          | 6                                                                                                              | 3907     | 0.93           | 0.86 to 1.01            | 0.10    | 0                | 0.89 | 0  | 0.69 |
|                                    | Not described/other timing | 10                                                                                                             | 283      | 0.98           | 0.80 to 1.20            | 0.82    | 0                | 0.93 | NA | NA   |
| Time of mortality observation      | 90 day                     | 2                                                                                                              | 2602     | 0.95           | 0.87 to 1.05            | 0.32    | 0                | 0.69 | 0  | 0.72 |
|                                    | 28-30 day                  | 3                                                                                                              | 1307     | 0.88           | 0.75 to 1.02            | 0.09    | 0                | 0.58 | NA | NA   |
|                                    | Hospital                   | 5                                                                                                              | 122      | 0.99           | 0.78 to 1.26            | 0.96    | 0                | 0.80 | NA | NA   |
|                                    | ICU                        | 6                                                                                                              | 160      | 1.03           | 0.72 to 1.48            | 0.88    | 0                | 0.86 | NA | NA   |
| <b>Meta-regression analysis</b>    |                            | Mixed effect meta-regression (unrestricted maximum likelihood) slope effect size, precision, and heterogeneity |          |                |                         |         |                  |      |    |      |
| Category                           | Covariate                  | Studies                                                                                                        | Patients | Point estimate | 95% confidence interval | P value | Tau <sup>2</sup> |      |    |      |
| Baseline mortality risk            | Comparison group mortality | 16                                                                                                             | 4190     | 0.0007         | -0.0046 to 0.0061       | 0.79    | 0                |      |    |      |
| Baseline septic shock              | Vasopressor use            | 12                                                                                                             | 4096     | 0.0018         | -0.0177 to 0.0544       | 0.32    | 0                |      |    |      |
| Baseline septic shock              | Lactate                    | 8                                                                                                              | 2742     | 0.0136         | -0.0589 to 0.0860       | 0.71    | 0                |      |    |      |
| Baseline pulmonary site infection  | Pulmonary infection        | 7                                                                                                              | 3944     | -0.0584        | -0.0267 to 0.0150       | 0.58    | 0                |      |    |      |
| Baseline invasive ventilation      | Invasive ventilation       | 14                                                                                                             | 4155     | 0.0018         | -0.0041 to 0.0076       | 0.56    | 0                |      |    |      |
| Baseline ARDS                      | ARDS                       | 8                                                                                                              | 1452     | 0.0276         | -0.0031 to 0.0037       | 0.87    | 0                |      |    |      |
| Baseline RRT                       | RRT                        | 3                                                                                                              | 2066     | 0.0072         | -0.0059 to 0.0203       | 0.28    | 0                |      |    |      |
| Baseline hypoalbuminaemia          | Baseline albumin level     | 6                                                                                                              | 3933     | -0.0124        | -0.0407 to 0.0159       | 0.39    | 0                |      |    |      |
| Intervention duration              | Days of intervention       | 16                                                                                                             | 4190     | -0.0100        | -0.0330 to 0.0160       | 0.45    | 0                |      |    |      |
| Daily intervention exposure        | Daily albumin dose         | 15                                                                                                             | 4170     | 0.0013         | -0.0013 to 0.0038       | 0.33    | 0                |      |    |      |
| Total intervention exposure        | Total albumin dose         | 15                                                                                                             | 4170     | 0.0006         | -0.0005 to 0.0018       | 0.26    | 0                |      |    |      |
| Total intervention exposure volume | Total albumin volume       | 15                                                                                                             | 4170     | -0.0172        | -0.1141 to              | 0.73    | 0                |      |    |      |

|                             |                                             |   |      |        |                   |      |   |
|-----------------------------|---------------------------------------------|---|------|--------|-------------------|------|---|
|                             |                                             |   |      |        | 0.0798            |      |   |
| Early intervention response | Day 1 post intervention albumin             | 4 | 3844 | 0.0007 | -0.0454 to 0.0440 | 0.97 | 0 |
| Intervention response       | Post intervention albumin level             | 5 | 3900 | 0.0173 | -0.0268 to 0.0613 | 0.44 | 0 |
| Intervention response       | Post intervention increase in albumin level | 5 | 3903 | 0.0116 | -0.0120 to 0.0352 | 0.34 | 0 |



## 5. Sensitivity, bias and clinical subgroup, and meta-regression analyses for the comparisons of albumin with crystalloid fluid

Predefined sensitivity, bias and clinical subgroup, and meta-regression analyses for the comparisons of albumin with crystalloid fluid.

Abbreviations: not applicable (NA); Surviving Sepsis Campaign launch (SSC).[\[19 20\]](#)

| Human albumin compared to crystalloid fluid |                             |                                        |          |                |                         |         |                     |                          |                     |                          |
|---------------------------------------------|-----------------------------|----------------------------------------|----------|----------------|-------------------------|---------|---------------------|--------------------------|---------------------|--------------------------|
| Sensitivity analysis                        |                             | Measures of effects size and precision |          |                |                         |         | Group heterogeneity |                          | Subgroup difference |                          |
| Category                                    | Group or subgroup           | Studies                                | Patients | Point estimate | 95% confidence interval | P value | I <sup>2</sup>      | Chi <sup>2</sup> P value | I <sup>2</sup>      | Chi <sup>2</sup> P value |
|                                             | All studies                 | 7                                      | 3878     | 0.93           | 0.86 to 1.01            | 0.07    | 0                   | 0.98                     | 0                   | 0.98                     |
| Fixed effects model with relative risk      | Low or unclear risk of bias | 4                                      | 3832     | 0.93           | 0.86 to 1.01            | 0.08    | 0                   | 0.78                     | NA                  | NA                       |
|                                             | High risk of bias           | 3                                      | 46       | 0.93           | 0.70 to 1.23            | 0.59    | 0                   | 0.99                     | NA                  | NA                       |
|                                             | All studies                 | 7                                      | 3878     | 0.89           | 0.78 to 1.01            | 0.07    | 0                   | 0.97                     | 0                   | 0.71                     |
| Fixed effects model with odds ratio         | Low or unclear risk of bias | 4                                      | 3832     | 0.89           | 0.78 to 1.01            | 0.08    | 0                   | 0.80                     | NA                  | NA                       |
|                                             | High risk of bias           | 3                                      | 46       | 0.66           | 0.14 to 3.13            | 0.60    | 0                   | 0.93                     | NA                  | NA                       |
|                                             | All studies                 | 7                                      | 3878     | 0.89           | 0.78 to 1.01            | 0.07    | 0                   | 0.97                     | 0                   | 0.71                     |
| Random effects model with odds ratio        | Low or unclear risk of bias | 4                                      | 3832     | 0.89           | 0.78 to 1.01            | 0.08    | 0                   | 0.80                     | NA                  | NA                       |

|                                                     |                                                                                             |         |          |                |                         |         |                     |                          |                     |                          |
|-----------------------------------------------------|---------------------------------------------------------------------------------------------|---------|----------|----------------|-------------------------|---------|---------------------|--------------------------|---------------------|--------------------------|
|                                                     | High risk of bias                                                                           | 3       | 46       | 0.66           | 0.14 to 3.16            | 0.61    | 0                   | 0.93                     | NA                  | NA                       |
|                                                     | All studies                                                                                 | 6       | 2068     | 0.92           | 0.82 to 1.02            | 0.13    | 0                   | 0.96                     | 0                   | 0.98                     |
| Trial exclusion: largest[1]                         | Low or unclear risk of bias                                                                 | 3       | 2022     | 0.92           | 0.81 to 1.04            | 0.16    | 0                   | 0.61                     | NA                  | NA                       |
|                                                     | High risk of bias                                                                           | 3       | 46       | 0.92           | 0.71 to 1.20            | 0.53    | 0                   | 0.99                     | NA                  | NA                       |
|                                                     | All studies                                                                                 | 6       | 2068     | 0.92           | 0.82 to 1.02            | 0.13    | 0                   | 0.96                     | 0                   | 0.98                     |
| Trial exclusion: greatest weight[1]                 | Low or unclear risk of bias                                                                 | 3       | 2034     | 0.92           | 0.81 to 1.04            | 0.16    | 0                   | 0.61                     | NA                  | NA                       |
|                                                     | High risk of bias                                                                           | 3       | 46       | 0.92           | 0.71 to 1.20            | 0.53    | 0                   | 0.99                     | NA                  | NA                       |
|                                                     | All studies                                                                                 | 6       | 2660     | 0.95           | 0.87 to 1.04            | 0.25    | 0                   | 1.00                     | 0                   | 0.81                     |
| Trial exclusion: greatest observed[14 15]           | Low or unclear risk of bias                                                                 | 3       | 2614     | 0.95           | 0.87 to 1.05            | 0.32    | 0                   | 0.92                     | NA                  | NA                       |
|                                                     | High risk of bias                                                                           | 3       | 46       | 0.92           | 0.71 to 1.20            | 0.53    | 0                   | 0.99                     | NA                  | NA                       |
| Subgroup analysis                                   | Relative risk effect size measure with random effects model (Mantel-Haenszel) and precision |         |          |                |                         |         | Group heterogeneity |                          | Subgroup difference |                          |
| Category                                            | Subgroups                                                                                   | Studies | Patients | Point estimate | 95% confidence interval | P value | I <sup>2</sup>      | Chi <sup>2</sup> P value | I <sup>2</sup>      | Chi <sup>2</sup> P value |
| Selection bias                                      | Low or unclear risk                                                                         | 7       | 3878     | 0.93           | 0.86 to 1.01            | 0.07    | 0                   | 0.98                     | NA                  | NA                       |
|                                                     | High risk                                                                                   | 0       | 0        | NA             | NA                      | NA      | NA                  | NA                       | NA                  | NA                       |
| Performance bias                                    | Low or unclear risk                                                                         | 4       | 3832     | 0.93           | 0.86 to 1.01            | 0.08    | 0                   | 0.76                     | 0                   | 0.91                     |
|                                                     | High risk                                                                                   | 3       | 46       | 0.92           | 0.71 to 1.20            | 0.53    | 0                   | 0.99                     | NA                  | NA                       |
| Detection bias                                      | Low or unclear risk                                                                         | 7       | 3878     | 0.93           | 0.86 to 1.01            | 0.07    | 0                   | 0.98                     | NA                  | NA                       |
|                                                     | High risk                                                                                   | 0       | 0        | NA             | NA                      | NA      | NA                  | NA                       | NA                  | NA                       |
| Attrition bias                                      | Low or unclear risk                                                                         | 7       | 3878     | 0.93           | 0.86 to 1.01            | 0.07    | 0                   | 0.98                     | NA                  | NA                       |
|                                                     | High risk                                                                                   | 0       | 0        | NA             | NA                      | NA      | NA                  | NA                       | NA                  | NA                       |
| Reporting bias                                      | Low or unclear risk                                                                         | 7       | 3878     | 0.93           | 0.86 to 1.01            | 0.07    | 0                   | 0.98                     | NA                  | NA                       |
|                                                     | High risk                                                                                   | 0       | 0        | NA             | NA                      | NA      | NA                  | NA                       | NA                  | NA                       |
| Research misconduct or duplication publication bias | Low or unclear risk                                                                         | 5       | 3856     | 0.93           | 0.86 to 1.01            | 0.07    | 0                   | 0.89                     | 0                   | 0.93                     |
|                                                     | High risk                                                                                   | 2       | 22       | 0.95           | 0.57 to 1.60            | 0.85    | 0                   | 1.00                     | NA                  | NA                       |

|                                                                    |                                   |   |      |      |              |      |    |      |    |      |
|--------------------------------------------------------------------|-----------------------------------|---|------|------|--------------|------|----|------|----|------|
| Other bias                                                         | Low or unclear risk               | 7 | 3878 | 0.93 | 0.86 to 1.01 | 0.07 | 0  | 0.98 | NA | NA   |
|                                                                    | High risk                         | 0 | 0    | NA   | NA           | NA   | NA | NA   | NA | NA   |
| Data source bias                                                   | Conferences                       | 2 | 2602 | 0.95 | 0.87 to 1.05 | 0.32 | 0  | 0.69 | 0  | 0.38 |
|                                                                    | Journal articles                  | 5 | 1276 | 0.88 | 0.77 to 1.01 | 0.08 | 0  | 1.00 | NA | NA   |
| Author bias                                                        | Boldt et al                       | 0 | 0    | NA   | NA           | NA   | NA | NA   | NA | NA   |
|                                                                    | Other authors                     | 7 | 3878 | 0.93 | 0.86 to 1.01 | 0.07 | 0  | 0.98 | NA | NA   |
| Location bias                                                      | Europe                            | 3 | 2614 | 0.95 | 0.87 to 1.05 | 0.32 | 0  | 0.92 | 0  | 0.63 |
|                                                                    | North America                     | 3 | 46   | 0.92 | 0.71 to 1.20 | 0.53 | 0  | 0.99 | NA | NA   |
|                                                                    | Australasia                       | 1 | 1218 | 0.87 | 0.74 to 1.02 | NA   | NA | NA   | NA | NA   |
| Small study bias                                                   | Multicentre                       | 3 | 3820 | 0.93 | 0.86 to 1.01 | 0.08 | 0  | 0.58 | 0  | 0.95 |
|                                                                    | Single centre                     | 4 | 58   | 0.92 | 0.71 to 1.20 | 0.54 | 0  | 0.10 | NA | NA   |
| Time bias                                                          | Post-SSC                          | 3 | 2614 | 0.95 | 0.87 to 1.05 | 0.32 | 0  | 0.92 | 0  | 0.37 |
|                                                                    | Pre-SSC                           | 4 | 1264 | 0.88 | 0.77 to 1.01 | 0.08 | 0  | 0.98 | NA | NA   |
| Disease severity (sepsis versus severe sepsis and/or septic shock) | Severe sepsis and/or septic shock | 7 | 3878 | 0.93 | 0.86 to 1.01 | 0.07 | 0  | 0.98 | NA | NA   |
|                                                                    | Sepsis                            | 0 | 0    | NA   | NA           | NA   | NA | NA   | NA | NA   |
| Disease severity (sepsis versus severe sepsis versus septic shock) | All studies                       | 7 | 3878 | 0.93 | 0.86 to 1.00 | 0.05 | 0  | 0.63 | 0  | 0.56 |
|                                                                    | Septic shock                      | 4 | 1949 | 0.91 | 0.82 to 1.01 | 0.06 | 0  | 0.77 | NA | NA   |
|                                                                    | Severe sepsis                     | 4 | 1929 | 0.96 | 0.83 to 1.10 | 0.55 | 0  | 0.29 | NA | NA   |
|                                                                    | Sepsis                            | 0 | 0    | NA   | NA           | NA   | NA | NA   | NA | NA   |
| Intervention method                                                | Predefined                        | 2 | 2602 | 0.95 | 0.87 to 1.05 | 0.32 | 0  | 0.69 | 0  | 0.32 |
|                                                                    | Variable                          | 5 | 1276 | 0.88 | 0.77 to 1.01 | 0.08 | 0  | 1.00 | NA | NA   |
| Intervention type                                                  | Hypooncotic (4-5% albumin)        | 5 | 1276 | 0.88 | 0.77 to 1.01 | 0.08 | 0  | 1.00 | 0  | 0.33 |
|                                                                    | Hyperoncotic (20% albumin)        | 2 | 2602 | 0.95 | 0.87 to 1.05 | 0.32 | 0  | 0.69 | NA | NA   |
| Intervention timing                                                | Early (<24 hours)                 | 4 | 3832 | 0.93 | 0.86 to 1.01 | 0.12 | 0  | 0.78 | 0  | 0.93 |
|                                                                    | Not described/other               | 3 | 46   | 0.92 | 0.71 to 1.20 | 0.53 | 0  | 0.99 | NA | NA   |

|                                    |                                 | timing                                                                                                            |          |                |                         |         |                  |      |    |      |
|------------------------------------|---------------------------------|-------------------------------------------------------------------------------------------------------------------|----------|----------------|-------------------------|---------|------------------|------|----|------|
| Time of mortality observation      | 90 day                          | 2                                                                                                                 | 2602     | 0.95           | 0.87 to 1.05            | 0.32    | 0                | 0.69 | 0  | 0.82 |
|                                    | 28-30 day                       | 1                                                                                                                 | 1218     | 0.87           | 0.74 to 1.02            | 0.09    | NA               | NA   | NA | NA   |
|                                    | Hospital                        | 3                                                                                                                 | 46       | 0.92           | 0.71 to 1.20            | 0.53    | 0                | 0.99 | NA | NA   |
|                                    | ICU                             | 1                                                                                                                 | 12       | 1              | 0.20 to 4.95            | 1       | NA               | NA   | NA | NA   |
| <b>Meta-regression analysis</b>    |                                 | Mixed effect meta-regression (unrestricted maximum likelihood)<br>slope effect size, precision, and heterogeneity |          |                |                         |         |                  |      |    |      |
| Category                           | Covariate                       | Studies                                                                                                           | Patients | Point estimate | 95% confidence interval | P value | Tau <sup>2</sup> |      |    |      |
| Baseline mortality risk            | Comparison group mortality      | 7                                                                                                                 | 3878     | 0.0000         | -0.0055 to 0.0054       | 0.98    | 0                |      |    |      |
| Baseline septic shock              | Vasopressor use                 | 6                                                                                                                 | 3854     | 0.0018         | -0.0018 to 0.0055       | 0.33    | 0                |      |    |      |
| Baseline septic shock              | Lactate                         | 5                                                                                                                 | 2636     | 0.0117         | -0.0895 to 0.0661       | 0.77    | 0                |      |    |      |
| Baseline pulmonary site infection  | Pulmonary infection             | 5                                                                                                                 | 3856     | -0.0026        | -0.0272 to 0.0221       | 0.83    | 0                |      |    |      |
| Baseline invasive ventilation      | Invasive ventilation            | 5                                                                                                                 | 3856     | 0.0258         | -0.0042 to 0.0093       | 0.45    | 0                |      |    |      |
| Baseline ARDS                      | ARDS                            | 3                                                                                                                 | 1241     | 0.0005         | -0.0031 to 0.0042       | 0.79    | 0                |      |    |      |
| Baseline RRT                       | RRT                             | 2                                                                                                                 | 2010     | NA             | NA                      | NA      | NA               |      |    |      |
| Baseline hypoalbuminaemia          | Baseline albumin level          | 4                                                                                                                 | 3832     | -0.0129        | -0.0427 to 0.0189       | 0.45    | 0                |      |    |      |
| Intervention duration              | Days of intervention            | 7                                                                                                                 | 3878     | -0.0054        | -0.0337 to 0.0229       | 0.71    | 0                |      |    |      |
| Daily intervention exposure        | Daily albumin dose              | 7                                                                                                                 | 3878     | 0.0003         | -0.0025 to 0.0031       | 0.82    | 0                |      |    |      |
| Total intervention exposure        | Total albumin dose              | 7                                                                                                                 | 3878     | 0.0006         | -0.0009 to 0.0022       | 0.41    | 0                |      |    |      |
| Total intervention exposure volume | Total albumin volume            | 7                                                                                                                 | 3878     | -0.0405        | -0.1401 to 0.0592       | 0.43    | 0                |      |    |      |
| Early intervention response        | Day 1 post intervention albumin | 4                                                                                                                 | 3832     | 0.0074         | -0.0454 to 0.0440       | 0.97    | 0                |      |    |      |

|                       |                                             |   |      |        |                   |      |   |
|-----------------------|---------------------------------------------|---|------|--------|-------------------|------|---|
| Intervention response | Post intervention albumin level             | 4 | 3832 | 0.0182 | -0.0259 to 0.0624 | 0.42 | 0 |
| Intervention response | Post intervention increase in albumin level | 4 | 3832 | 0.0124 | -0.0114 to 0.0362 | 0.31 | 0 |

## 6. Sensitivity, bias and clinical subgroup, and meta-regression analyses for the comparisons of albumin with colloid fluid

Predefined sensitivity, bias and clinical subgroup, and meta-regression analyses for the comparisons of albumin with colloid fluid.

Abbreviations: not applicable (NA); Surviving Sepsis Campaign launch (SSC);[[19](#) [20](#)] hydroxyethyl starch (HES)

| Human albumin compared to colloid fluid |                             |                                        |          |                |                         |         |                     |                          |                     |                          |
|-----------------------------------------|-----------------------------|----------------------------------------|----------|----------------|-------------------------|---------|---------------------|--------------------------|---------------------|--------------------------|
| Sensitivity analysis                    |                             | Measures of effects size and precision |          |                |                         |         | Group heterogeneity |                          | Subgroup difference |                          |
| Category                                | Group or subgroup           | Studies                                | Patients | Point estimate | 95% confidence interval | P value | I <sup>2</sup>      | Chi <sup>2</sup> P value | I <sup>2</sup>      | Chi <sup>2</sup> P value |
|                                         | All studies                 | 13                                     | 299      | 1.02           | 0.77 to 1.35            | 0.87    | 0                   | 0.92                     | 26.7                | 0.24                     |
| Fixed effects model with relative risk  | Low or unclear risk of bias | 3                                      | 116      | 0.76           | 0.41 to 1.40            | 0.38    | 0                   | 0.83                     | NA                  | NA                       |
|                                         | High risk of bias           | 8                                      | 183      | 1.14           | 0.83 to 1.58            | 0.87    | 0                   | 0.92                     | NA                  | NA                       |
|                                         | All studies                 | 13                                     | 299      | 1.04           | 0.64 to 1.71            | 0.87    | 0                   | 0.91                     | 32.2                | 0.23                     |
| Fixed effects model with odds ratio     | Low or unclear risk of bias | 3                                      | 116      | 0.67           | 0.28 to 1.61            | 0.37    | 0                   | 0.88                     | NA                  | NA                       |
|                                         | High risk of bias           | 8                                      | 183      | 1.29           | 0.70 to 2.37            | 0.41    | 0                   | 0.88                     | NA                  | NA                       |
|                                         | All studies                 | 13                                     | 299      | 1.04           | 0.63 to 1.71            | 0.89    | 0                   | 0.91                     | 29.1                | 0.24                     |
| Random effects model with odds ratio    | Low or unclear risk of bias | 3                                      | 116      | 0.67           | 0.28 to 1.61            | 0.37    | 0                   | 0.88                     | NA                  | NA                       |

|                                                     |                                                                                             |         |          |                |                         |         |                     |                          |                     |                          |
|-----------------------------------------------------|---------------------------------------------------------------------------------------------|---------|----------|----------------|-------------------------|---------|---------------------|--------------------------|---------------------|--------------------------|
|                                                     | High risk of bias                                                                           | 8       | 183      | 1.29           | 0.69 to 2.39            | 0.42    | 0                   | 0.88                     | NA                  | NA                       |
|                                                     | All studies                                                                                 | 12      | 243      | 1.08           | 0.82 to 1.44            | 0.58    | 0                   | 0.95                     | 0                   | 0.52                     |
| Trial exclusion: largest[6]                         | Low or unclear risk of bias                                                                 | 2       | 60       | 0.87           | 0.42 to 1.79            | 0.70    | 0                   | 0.88                     | NA                  | NA                       |
|                                                     | High risk of bias                                                                           | 8       | 183      | 1.13           | 0.83 to 1.53            | 0.45    | 0                   | 0.89                     | NA                  | NA                       |
|                                                     | All studies                                                                                 | 12      | 269      | 1.06           | 0.77 to 1.48            | 0.34    | 0                   | 0.86                     | 31.3                | 0.23                     |
| Trial exclusion: greatest weight[2]                 | Low or unclear risk of bias                                                                 | 3       | 116      | 0.77           | 0.42 to 1.43            | 0.41    | 0                   | 0.83                     | NA                  | NA                       |
|                                                     | High risk of bias                                                                           | 7       | 153      | 1.21           | 0.82 to 1.79            | 0.34    | 0                   | 0.86                     | NA                  | NA                       |
|                                                     | All studies                                                                                 | 12      | 271      | 1.01           | 0.76 to 1.34            | 0.97    | 0                   | 0.95                     | 0                   | 0.34                     |
| Trial exclusion: greatest observed power[5]         | Low or unclear risk of bias                                                                 | 3       | 116      | 0.77           | 0.42 to 1.43            | 0.41    | 0                   | 0.83                     | NA                  | NA                       |
|                                                     | High risk of bias                                                                           | 7       | 155      | 1.08           | 0.78 to 1.49            | 0.64    | 0                   | 0.93                     | NA                  | NA                       |
| Subgroup analysis                                   | Relative risk effect size measure with random effects model (Mantel-Haenszel) and precision |         |          |                |                         |         | Group heterogeneity |                          | Subgroup difference |                          |
| Category                                            | Subgroups                                                                                   | Studies | Patients | Point estimate | 95% confidence interval | P value | I <sup>2</sup>      | Chi <sup>2</sup> P value | I <sup>2</sup>      | Chi <sup>2</sup> P value |
| Selection bias                                      | Low or unclear risk                                                                         | 11      | 299      | 1.04           | 0.79 to 1.38            | 0.76    | 0                   | 0.92                     | NA                  | NA                       |
|                                                     | High risk                                                                                   | 0       | 0        | NA             | NA                      | NA      | NA                  | NA                       | NA                  | NA                       |
| Performance bias                                    | Low or unclear risk                                                                         | 7       | 232      | 0.98           | 0.70 to 1.37            | 0.90    | 0                   | 0.85                     | 0                   | 0.51                     |
|                                                     | High risk                                                                                   | 4       | 67       | 1.20           | 0.73 to 1.95            | 0.47    | 0                   | 0.72                     | NA                  | NA                       |
| Detection bias                                      | Low or unclear risk                                                                         | 11      | 299      | 1.04           | 0.79 to 1.38            | 0.76    | 0                   | 0.92                     | NA                  | NA                       |
|                                                     | High risk                                                                                   | 0       | 0        | NA             | NA                      | NA      | NA                  | NA                       | NA                  | NA                       |
| Attrition bias                                      | Low or unclear risk                                                                         | 11      | 299      | 1.04           | 0.79 to 1.38            | 0.76    | 0                   | 0.92                     | NA                  | NA                       |
|                                                     | High risk                                                                                   | 0       | 0        | NA             | NA                      | NA      | NA                  | NA                       | NA                  | NA                       |
| Reporting bias                                      | Low or unclear risk                                                                         | 11      | 299      | 1.04           | 0.79 to 1.38            | 0.76    | 0                   | 0.92                     | NA                  | NA                       |
|                                                     | High risk                                                                                   | 0       | 0        | NA             | NA                      | NA      | NA                  | NA                       | NA                  | NA                       |
| Research misconduct or duplication publication bias | Low or unclear risk                                                                         | 5       | 156      | 0.83           | 0.52 to 1.32            | 0.42    | 0                   | 0.96                     | 33.0                | 0.22                     |
|                                                     | High risk                                                                                   | 6       | 143      | 1.19           | 0.84 to 1.67            | 0.33    | 0                   | 0.80                     | NA                  | NA                       |

|                     |                                   |            |     |      |              |              |      |      |      |      |
|---------------------|-----------------------------------|------------|-----|------|--------------|--------------|------|------|------|------|
| Other bias          | Low or unclear risk               | 8          | 111 | 1.08 | 0.75 to 1.55 | 0.68         | 0    | 0.77 | 0    | 0.79 |
|                     | High risk                         | 3          | 88  | 1.00 | 0.65 to 1.53 | 1.00         | 0    | 0.85 | NA   | NA   |
| Data source bias    | Conferences                       | 0          | 0   | NA   | NA           | NA           | NA   | NA   | NA   | NA   |
|                     | Journal articles                  | 11         | 299 | 1.04 | 0.79 to 1.38 | 0.76         | 0    | 0.92 | NA   | NA   |
| Author bias         | Boldt et al                       | 4          | 116 | 1.08 | 0.73 to 1.61 | 0.70         | 0    | 0.67 | 0    | 0.8  |
|                     | Other authors                     | 7          | 183 | 1.01 | 0.69 to 1.48 | 0.96         | 0    | 0.81 | NA   | NA   |
| Location bias       | Europe                            | 8          | 252 | 0.96 | 0.70 to 1.33 | 0.81         | 0    | 0.90 | 0    | 0.33 |
|                     | North America                     | 3          | 47  | 1.31 | 0.77 to 2.23 | 0.32         | 0    | 0.73 | NA   | NA   |
|                     | Australasia                       | 0          | 0   | NA   | NA           | NA           | NA   | NA   | NA   | NA   |
| Small study bias    | Multicentre                       | 0          | 0   | NA   | NA           | NA           | NA   | NA   | NA   | NA   |
|                     | Single centre                     | 11         | 299 | 1.04 | 0.79 to 1.38 | 0.76         | 0    | 0.92 | NA   | NA   |
| Time bias           | Post-SSC                          | 4          | 136 | 0.77 | 0.44 to 1.33 | 0.35         | 0    | 0.95 | 38.1 | 0.20 |
|                     | Pre-SSC                           | 7          | 163 | 1.16 | 0.84 to 1.60 | 0.36         | 0    | 0.87 | NA   | NA   |
| Disease severity    | Severe sepsis and/or septic shock | 7          | 141 | 1.04 | 0.68 to 1.59 | 0.86         | 0    | 0.71 | 0    | 0.98 |
|                     | Sepsis                            | 5          | 158 | 1.05 | 0.73 to 1.51 | 0.80         | 0    | 0.79 | NA   | NA   |
|                     | All studies                       | 11         | 299 | 1.04 | 0.79 to 1.38 | 0.76         | 0    | 0.92 | 8.0  | 0.34 |
|                     | Septic shock                      | 2          | 27  | 1.54 | 0.78 to 3.01 | 0.21         | 0    | 0.82 | NA   | NA   |
|                     | Severe sepsis                     | 4          | 114 | 0.80 | 0.46 to 1.39 | 0.43         | 0    | 0.90 | NA   | NA   |
|                     | Sepsis                            | 5          | 158 | 1.05 | 0.73 to 1.51 | 0.80         | 0    | 0.79 | NA   | NA   |
|                     | Intervention method               | Predefined | 2   | 98   | 0.77         | 0.38 to 1.53 | 0.45 | 0    | 0.54 | 0    |
|                     | Variable                          | 9          | 201 | 1.11 | 0.82 to 1.50 | 0.51         | 0    | 0.92 | NA   | NA   |
| Intervention type   | Hypooncotic (4-5% albumin)        | 5          | 107 | 1.13 | 0.74 to 1.74 | 0.57         | 0    | 0.83 | 0    | 0.62 |
|                     | Hyperoncotic (20% albumin)        | 6          | 192 | 0.99 | 0.69 to 1.41 | 0.94         | 0    | 0.74 | NA   | NA   |
| Intervention timing | Early (<24 hours)                 | 2          | 48  | 1.04 | 0.45 to 2.42 | 0.93         | 0    | 0.61 | 0    | 0.99 |
|                     | Not described/other timing        | 9          | 251 | 1.05 | 0.78 to 1.40 | 0.77         | 0    | 0.84 | NA   | NA   |



|                                         |                                                                                                                |         |          |                |                         |         |                  |      |      |      |
|-----------------------------------------|----------------------------------------------------------------------------------------------------------------|---------|----------|----------------|-------------------------|---------|------------------|------|------|------|
| Time of mortality observation           | 90 day                                                                                                         | 0       | 0        | NA             | NA                      | NA      | NA               | NA   | 0    | 0.52 |
|                                         | 28-30 day                                                                                                      | 1       | 56       | 0.58           | 0.18 to 1.83            | 0.35    | NA               | NA   | NA   | NA   |
|                                         | Hospital                                                                                                       | 4       | 89       | 1.18           | 0.75 to 1.86            | 0.47    | 0                | 0.76 | NA   | NA   |
|                                         | ICU                                                                                                            | 6       | 154      | 1.02           | 0.71 to 1.47            | 0.90    | 0                | 0.85 | NA   | NA   |
| Colloid type: hydroxyethyl starch (HES) | 6% tetrastarch 130 kDa                                                                                         | 2       | 76       | 0.65           | 0.28 to 1.51            | 0.32    | 0                | 0.76 | 26.3 | 0.24 |
|                                         | Other HES                                                                                                      | 9       | 223      | 1.11           | 0.83 to 1.48            | 0.50    | 0                | 0.93 | NA   | NA   |
| Colloid type: Gelatin                   | Gelatin                                                                                                        | 1       | 12       | 1.00           | 0.20 to 4.95            | 1       | NA               | NA   | NA   | NA   |
| <b>Meta-regression analysis</b>         | Mixed effect meta-regression (unrestricted maximum likelihood) slope effect size, precision, and heterogeneity |         |          |                |                         |         |                  |      |      |      |
| Category                                | Covariate                                                                                                      | Studies | Patients | Point estimate | 95% confidence interval | P value | Tau <sup>2</sup> |      |      |      |
| Baseline mortality risk                 | Comparison group mortality                                                                                     | 11      | 299      | 0.0022         | -0.0143 to 0.0187       | 0.79    | 0                |      |      |      |
| Baseline septic shock                   | Vasopressor use                                                                                                | 8       | 229      | 0.0090         | -0.0162 to 0.0144       | 0.91    | 0                |      |      |      |
| Baseline septic shock                   | Lactate                                                                                                        | 5       | 99       | 0.0025         | -0.2359 to 0.02409      | 0.98    | 0                |      |      |      |
| Baseline pulmonary site infection       | Pulmonary infection                                                                                            | 3       | 100      | -0.0287        | -0.1103 to 0.0529       | 0.49    | 0                |      |      |      |
| Baseline invasive ventilation           | Invasive ventilation                                                                                           | 9       | 272      | 0.0000         | -0.0243 to 0.024        | 0.93    | 0                |      |      |      |
| Baseline ARDS                           | ARDS                                                                                                           | 6       | 210      | 0.0009         | -0.0100 to 0.0080       | 0.83    | 0                |      |      |      |
| Baseline RRT                            | RRT                                                                                                            | 1       | 56       | NA             | NA                      | NA      | NA               |      |      |      |
| Baseline hypoalbuminaemia               | Baseline albumin level                                                                                         | 2       | 80       | NA             | NA                      | NA      | NA               |      |      |      |
| Intervention duration                   | Days of intervention                                                                                           | 11      | 299      | -0.0077        | -0.1318 to 0.1163       | 0.90    | 0                |      |      |      |
| Daily intervention exposure             | Daily albumin dose                                                                                             | 10      | 279      | 0.0015         | -0.0032 to 0.0061       | 0.54    | 0                |      |      |      |
| Total intervention exposure             | Total albumin dose                                                                                             | 10      | 279      | 0.0004         | -0.0001 to 0.0023       | 0.64    | 0                |      |      |      |
| Total intervention exposure volume      | Total albumin volume                                                                                           | 10      | 279      | 0.2861         | -0.0681 to              | 0.11    | 0                |      |      |      |

|                             |                                             |   |    |    |        |    |    |
|-----------------------------|---------------------------------------------|---|----|----|--------|----|----|
|                             |                                             |   |    |    | 0.6404 |    |    |
| Early intervention response | Day 1 post intervention albumin             | 1 | 24 | NA | NA     | NA | NA |
| Intervention response       | Post intervention albumin level             | 2 | 80 | NA | NA     | NA | NA |
| Intervention response       | Post intervention increase in albumin level | 2 | 80 | NA | NA     | NA | NA |

## 7. Trial sequential analysis model with RASP or CRISTAL for human albumin compared to control fluid, with or without exclusion of studies at high risk of bias

The graphs show trial sequential analysis of sixteen primary trials reporting all-cause mortality comparing pooled human albumin solutions to control fluids. They both model the possible effect of RASP[21] or CRISTAL[22] as a bold type-face segment of the cumulative z score. RASP[21] is an on-going double-blinded randomised clinical trial that was given a hypothetical relative risk of 0.9. CRISTAL[22] is an open label randomised trial that compared colloid and crystalloid fluids but albumin infusion was permitted for hypoalbuminaemia in all treatment groups, which was not subject to randomisation. CRISTAL is included in this exploratory model for clinical interest only. A diversity adjusted information size of 4894 patients was calculated for both models using  $\alpha=0.05$  (two sided),  $\beta=0.20$  (power 80%), an anticipated relative risk of 10.0%, and an event proportion of 38.6% in the control arm. The blue cumulative z score was constructed using a random effects model, and the green curve represents an adjusted z score. For the RASP model, the relative risk was 0.94,  $P=0.08$ , consistent with the conclusion of no mortality benefit with human albumin. Trial sequential analysis correction for random error and repeated hypothesis testing of 95% confidence interval (0.87 to 1.01;  $D^2=0\%$ ) did not alter this finding. Using the exploratory CRISTAL model also did not alter this conclusion (relative risk 0.94,  $P=0.13$ ; 95% confidence interval 0.88 to 1.02;  $D^2=0\%$ ).

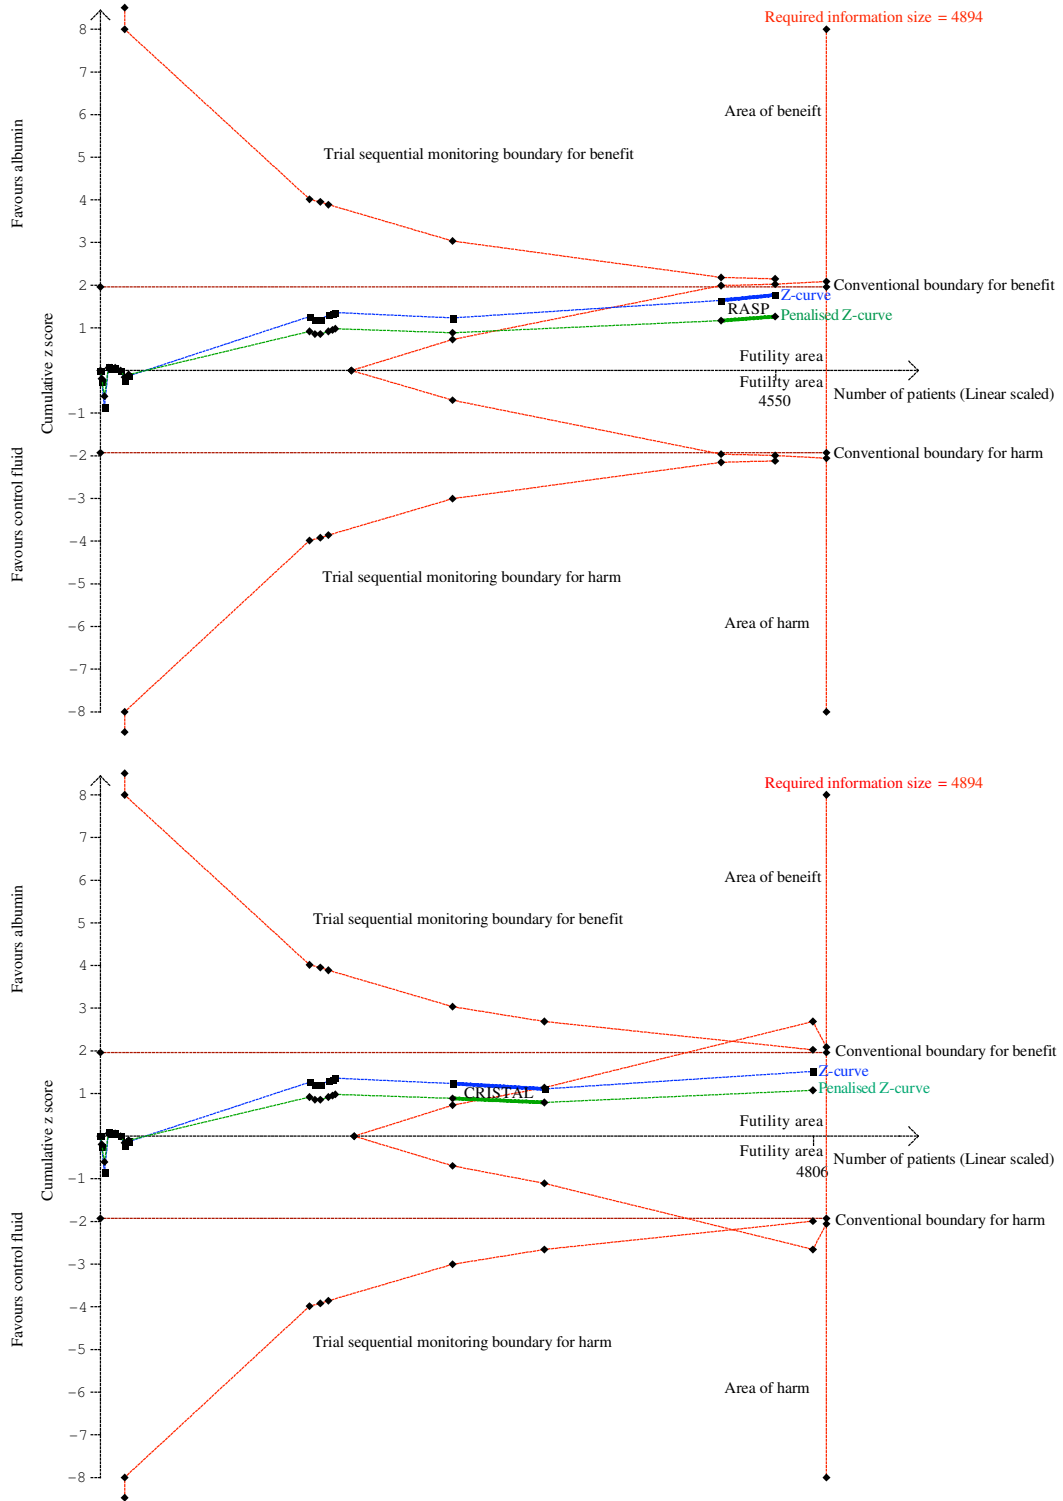

The graphs show trial sequential analysis of six primary trials, after exclusion of studies that were at high risk of bias, reporting all-cause mortality comparing pooled human albumin solutions to control fluids. They both model the possible effect of RASP[21] or CRISTAL[22] as a bold type-face segment of the cumulative z score. RASP[21] is an on-going double-blinded randomised clinical trial that was given a hypothetical relative risk of 0.9. CRISTAL[22] is an open label randomised trial that compared colloid and crystalloid fluids but albumin infusion was permitted for hypoalbuminaemia in all treatment groups, which was not subject to randomisation. CRISTAL is included in this exploratory model for clinical interest only. A diversity adjusted information size of 4894 patients was calculated for both models using  $\alpha=0.05$  (two sided),  $\beta=0.20$  (power 80%), an anticipated relative risk of 10.0%, and an event proportion of 38.6% in the control arm. The blue cumulative z score was constructed using a random effects model, and the green curve represents an adjusted z score. For the RASP model, the relative risk was 0.94 and  $P=0.05$ . However, trial sequential analysis correction for random error and repeated hypothesis testing of the 95% confidence interval (0.85 to 1.02;  $D^2=0\%$ ), was consistent with no benefit with albumin given that the z score touched only the conventional boundary of benefit but not the trial sequential monitoring boundary for benefit. The penalised z score does not cross the conventional boundary of benefit. Adding RASP is very unlikely to be associated with harm, as the z score would need to cross the boundary of futility. Using the exploratory CRISTAL model did not alter conclusion of no mortality benefit with human albumin (relative risk 0.93,  $P=0.08$ ; 95% confidence interval 0.86 to 1.01;  $D^2=0\%$ ).

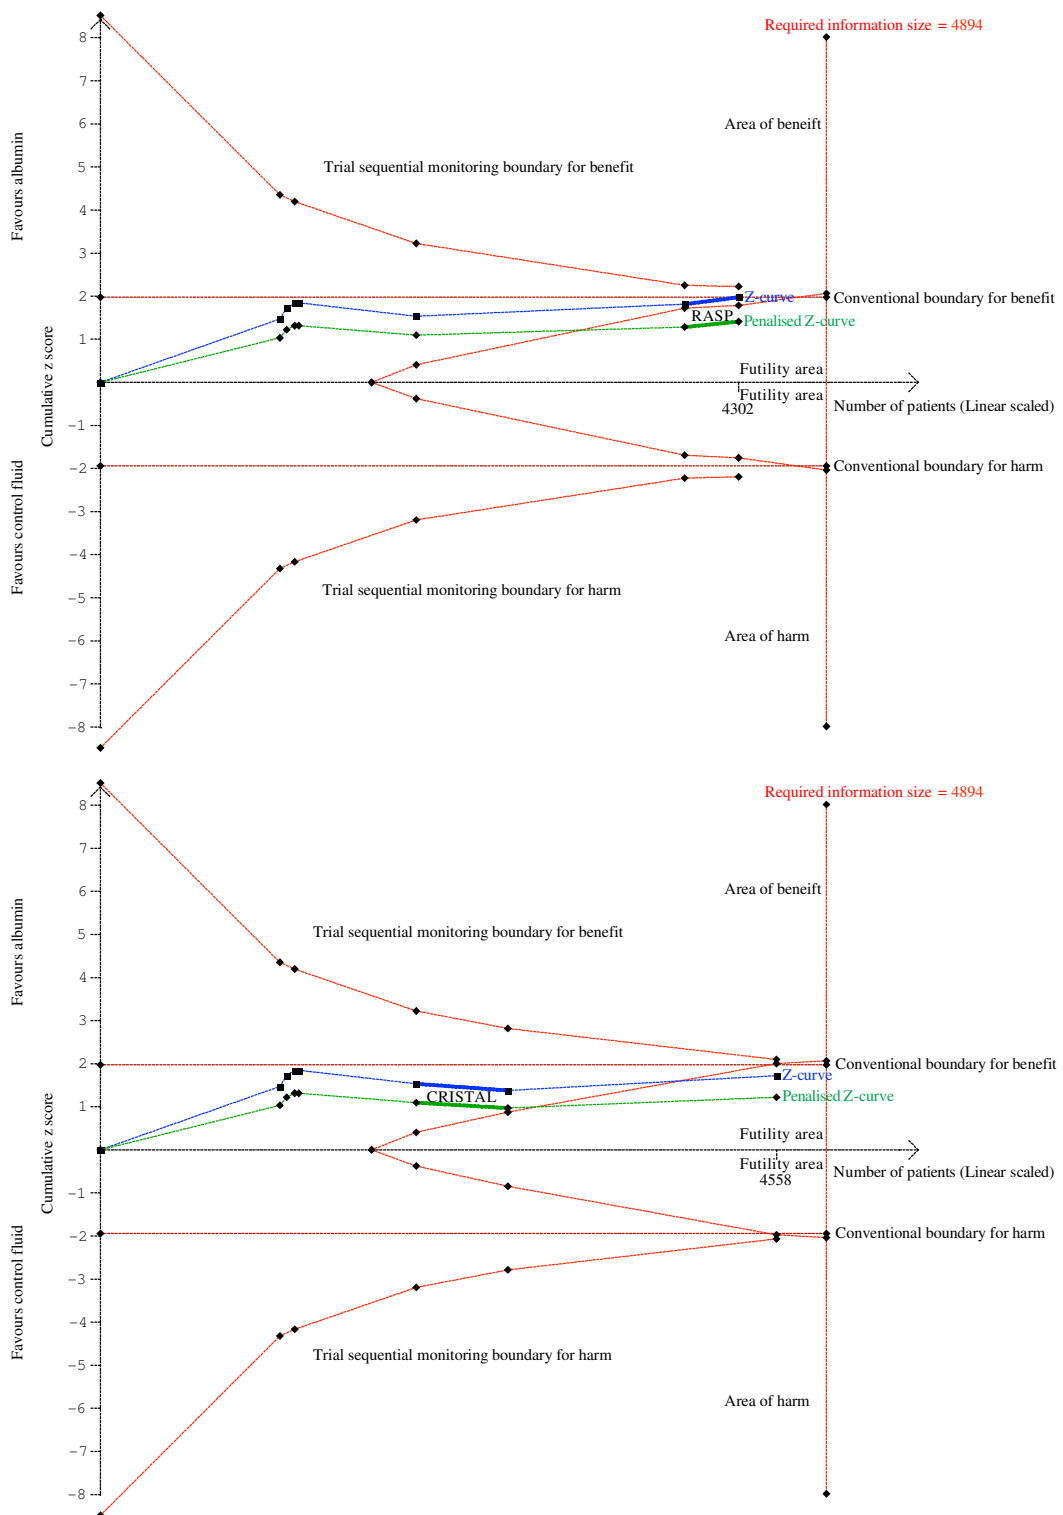

## 8. Trial sequential analysis models with RASP or CRISTAL for human albumin compared to crystalloid fluid, with or without exclusion of studies at high risk of bias

The graphs show trial sequential analysis of seven primary trials reporting all-cause mortality comparing pooled human albumin solutions to crystalloid fluid. They both model the possible effect of RASP[21] or CRISTAL[22] as a bold type-face segment of the cumulative z score. RASP[21] is an on-going double-blinded randomised clinical trial that was given a hypothetical relative risk of 0.9. CRISTAL[22] is an open label randomised trial that compared colloid and crystalloid fluids but albumin infusion was permitted for hypoalbuminaemia in all treatment groups, which was not subject to randomisation. CRISTAL is included in this exploratory model for clinical interest only. A diversity adjusted information size of 4856 patients was calculated for both models using  $\alpha=0.05$  (two sided),  $\beta=0.20$  (power 80%), an anticipated relative risk of 10.0%, and an event proportion of 38.8% in the control arm. The blue cumulative z score was constructed using a random effects model, and the green curve represents an adjusted z score. For the RASP model, the relative risk was 0.93 and  $P=0.05$ . Trial sequential analysis correction for random error and repeated hypothesis testing of the 95% confidence interval (0.85 to 1.01;  $D^2=0\%$ ) was consistent with no benefit with albumin. The cumulative z score touches the conventional boundary of benefit but not the trial sequential monitoring boundary of benefit. Harm seems unlikely with this RASP model as the z score would need to cross the futility area to touch the trial sequential monitoring boundary of harm. Using the exploratory

CRISTAL model did not alter the conclusion of no mortality benefit (relative risk 0.94, P=0.09; 95% confidence interval 0.86 to 1.01; D<sup>2</sup>=0%).

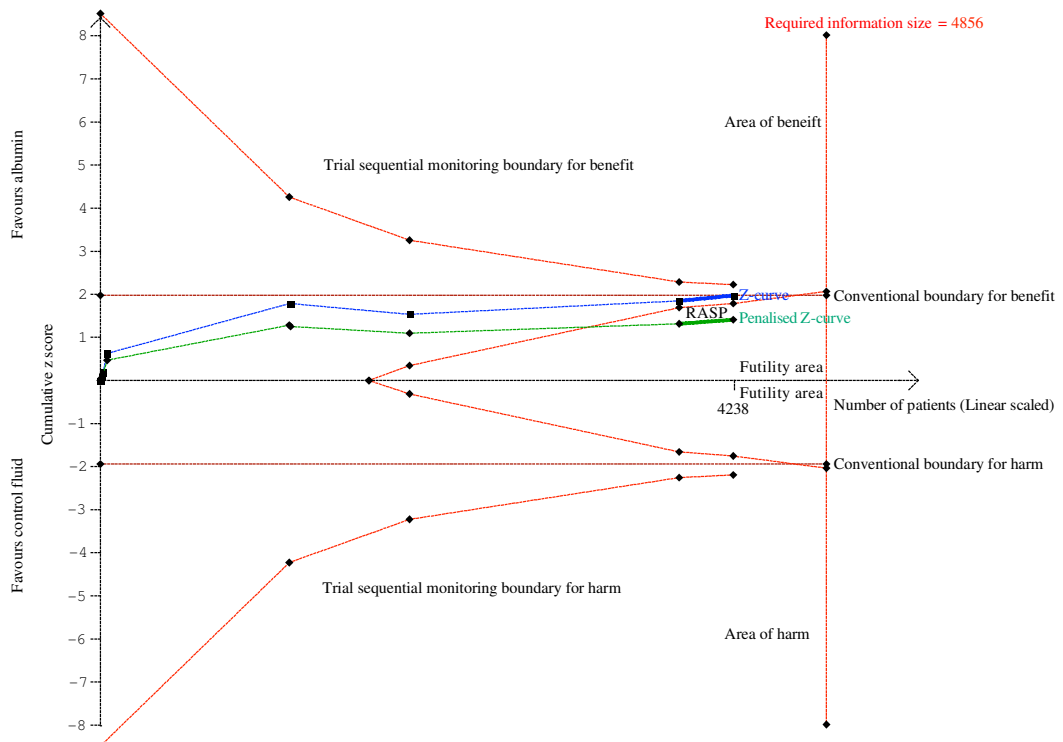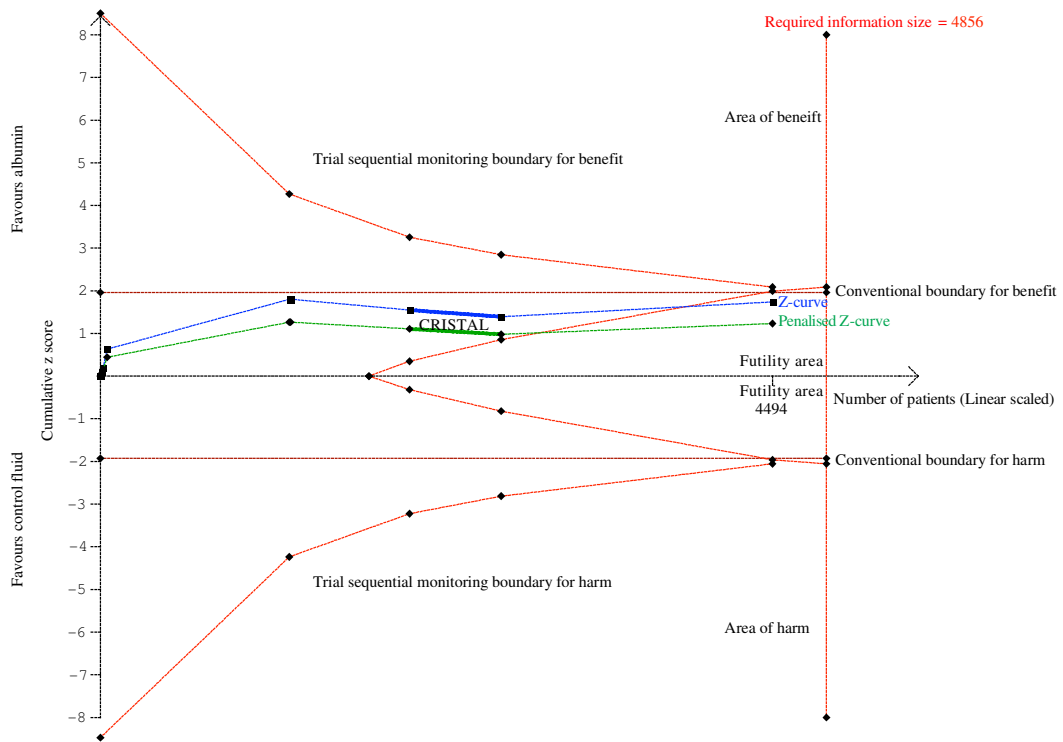



The graphs show trial sequential analysis of four primary trials reporting all-cause mortality comparing pooled human albumin solutions to control fluids. They both model the possible effect of RASP[21] or CRISTAL[22] as a bold type-face segment of the cumulative z score. RASP[21] is an on-going double-blinded randomised clinical trial that was given a hypothetical relative risk of 0.9. CRISTAL[22] is an open label randomised trial that compared colloid and crystalloid fluids but albumin infusion was permitted for hypoalbuminaemia in all treatment groups, which was not subject to randomisation. CRISTAL is included in this exploratory model for clinical interest only. A diversity adjusted information size of 4856 patients was calculated for both models using  $\alpha=0.05$  (two sided),  $\beta=0.20$  (power 80%), an anticipated relative risk of 10.0%, and an event proportion of 38.8% in the control arm. The blue cumulative z score was constructed using a random effects model, and the green curve represents an adjusted z score. For the RASP model, the relative risk was 0.93 and  $P=0.06$ . Trial sequential analysis correction for random error and repeated hypothesis testing of 95% confidence interval (0.85 to 1.01;  $D^2=0\%$ ) was consistent with no mortality benefit. The cumulative z score is between the futility boundary and the conventional boundary of benefit, but not the trial sequential monitoring boundary of benefit. Harm also seems unlikely with this RASP model as the z score would need to cross the futility area to touch the trial sequential monitoring boundary of harm. Using the exploratory CRISTAL model did not alter the conclusion of no mortality benefit (relative risk 0.94,  $P=0.11$ ; 95% confidence interval 0.86 to 1.02;  $D^2=0\%$ ).

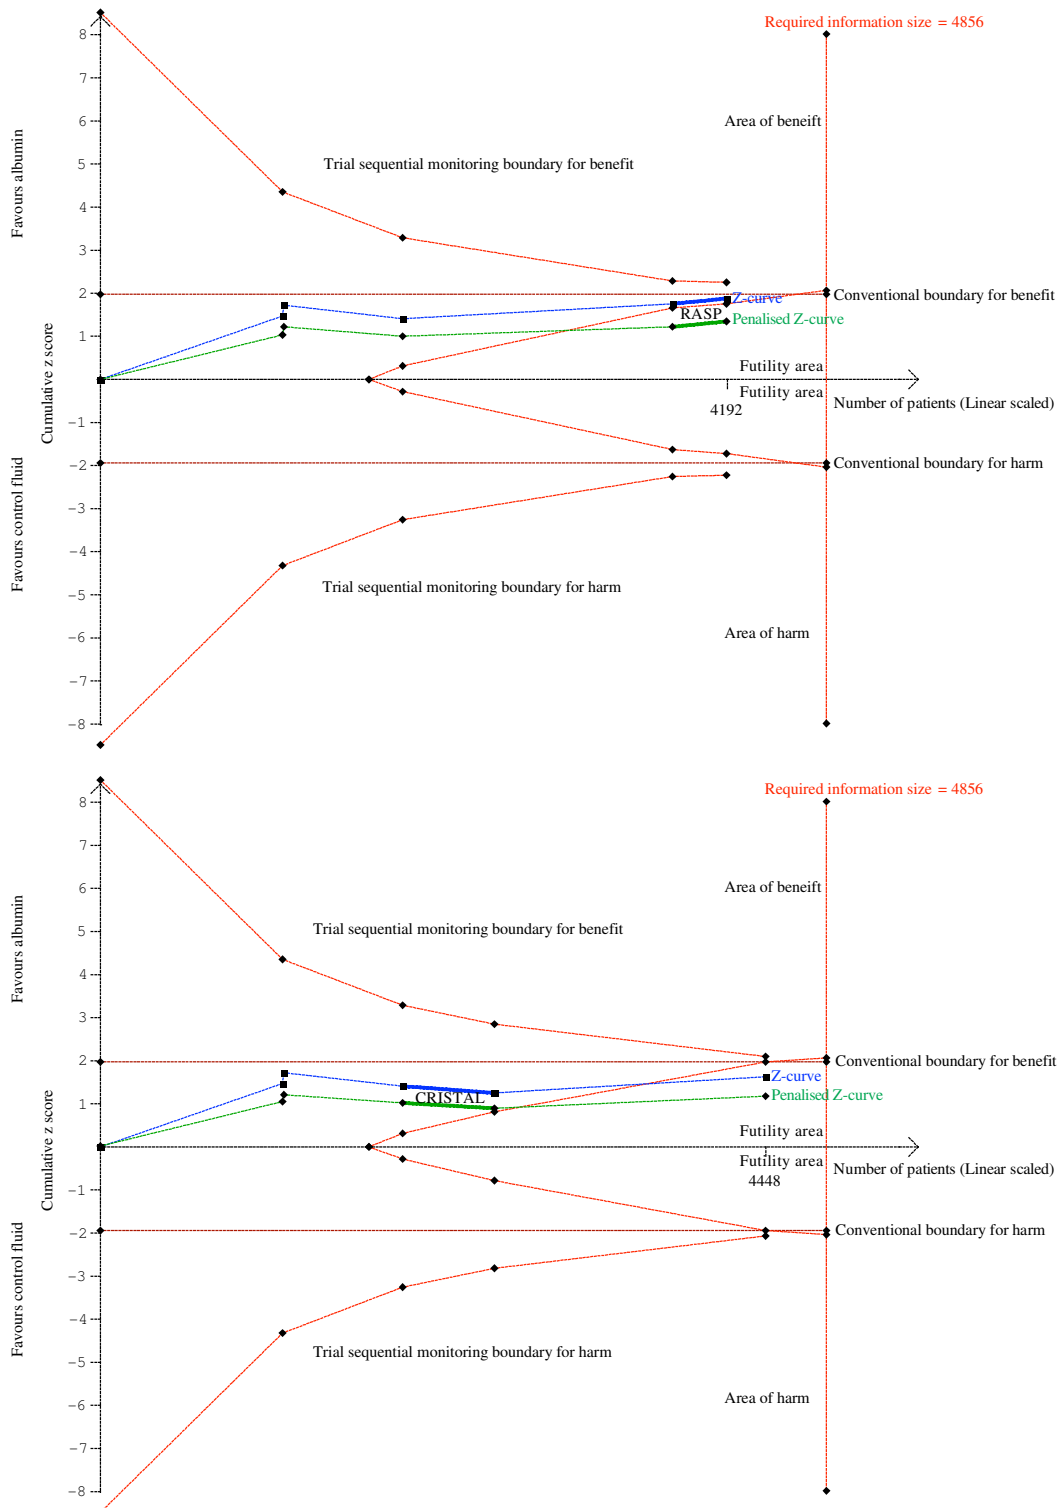

## **9. Forest plots and trial sequential analyses for the comparisons of human albumin compared to control fluid by sepsis subgroup, with or without exclusion of studies at high risk of bias**

Forest plot of the relative risk of all-cause mortality in patients exposed to human albumin solutions compared to control fluid stratified by sepsis severity subgroup for all studies. Squares to the left of the line indicate that albumin reduced the risk of mortality; horizontal lines indicate 95% confidence intervals; square size represents relative study weight; the diamond indicates the aggregated random effects relative risk (95% confidence interval; M-H (Mantel-Haenszel). Data from ALBIOS[1] were separated into severe sepsis and septic shock subgroups as 90 day mortality outcome data were available. Studies are ordered chronologically within subgroups.

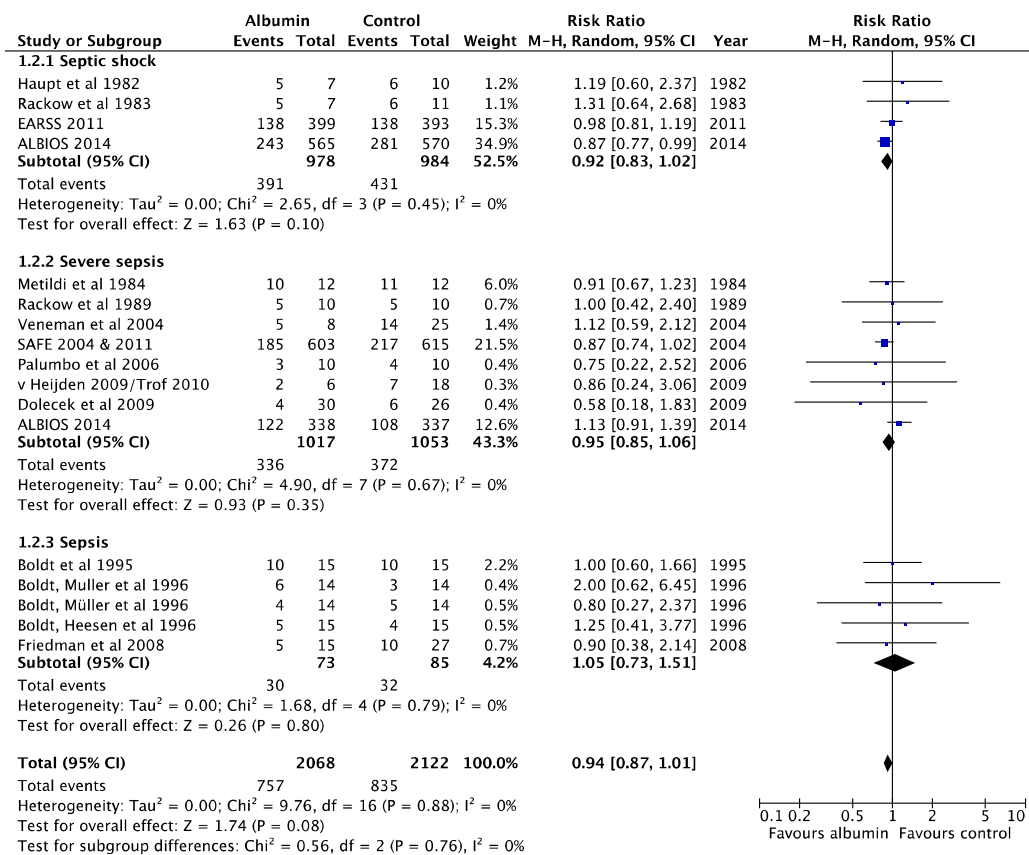

Forest plot of the relative risk of all-cause mortality in patients exposed to human albumin solutions compared to control fluid stratified by sepsis severity subgroup after exclusion of studies at high risk of bias. Squares to the left of the line indicate that albumin reduced the risk of mortality; horizontal lines indicate 95% confidence intervals; square size represents relative study weight; the diamond indicates the aggregated random effects relative risk (95% confidence interval; M-H (Mantel-Haenszel). Data from ALBIOS[1] were separated into severe sepsis and septic shock subgroups as 90 day mortality outcome data were available. Studies are ordered chronologically within subgroups.

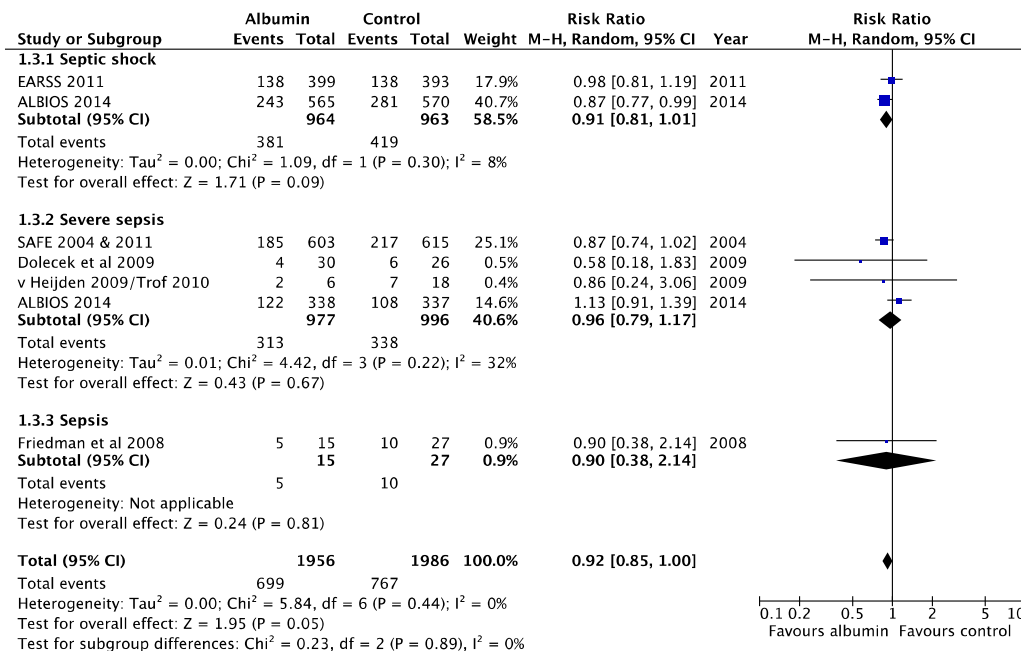

The graphs show trial sequential analysis of studies reporting all-cause mortality comparing pooled human albumin solutions to control fluids. The upper graph included all studies and the lower graph had excluded studies at high risk of bias. A diversity adjusted information size of 4895 patients was calculated for both models using  $\alpha=0.05$  (two sided),  $\beta=0.20$  (power 80%), an anticipated relative risk of 10.0%, and an event proportion of 38.6% in the control arm. When all studies are included, the relative risk is 0.94 and  $P=0.08$ ;  $D^2=0\%$ . The blue cumulative z curve was constructed using a random effects model, and the green curve represents an adjusted z curve. The cumulative z score has crossed the futility boundary consistent with no survival benefit. After excluding studies at high risk of bias the relative risk point estimate becomes 0.92, and  $P=0.05$ . The trial sequential analysis corrected 95% confidence interval (0.84 to 1.01;  $D^2=0\%$ ) indicates there does not seem to be robust evidence of albumin benefit.

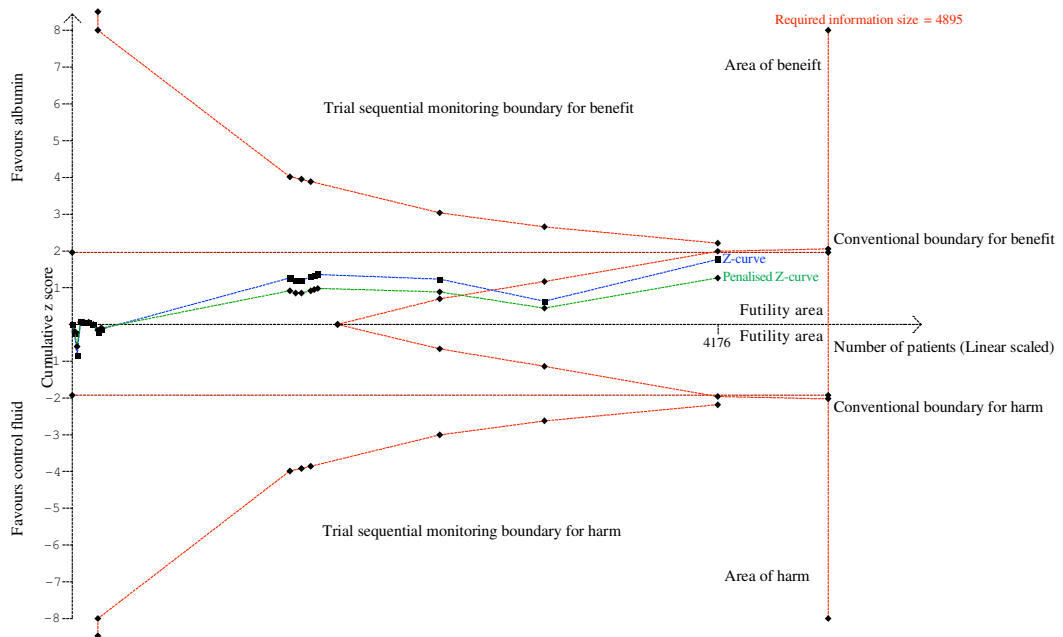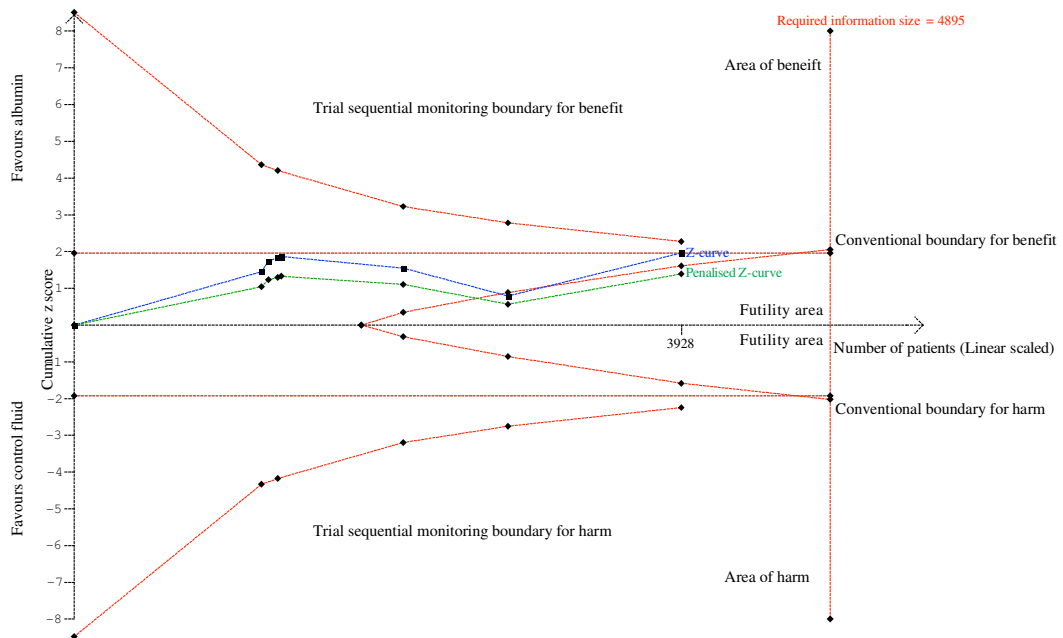

The graphs show trial sequential analysis of studies reporting all-cause mortality comparing pooled human albumin solutions to control fluids in patients with septic shock where mortality outcome data were available. The upper graph included all studies and the lower graph had excluded studies at high risk of bias. A diversity adjusted information size was calculated for both models using  $\alpha=0.05$  (two sided),  $\beta=0.20$  (power 80%), an anticipated relative risk of 10.0%, and an event proportion of 43.5% in the control arm. The blue cumulative z curve was constructed using a random effects model, and the green curve represents an adjusted z curve. When all studies are included the relative risk is 0.94 and  $P=0.08$ . The trial sequential analysis corrected 95% confidence interval (0.78 to 1.07;  $D^2=0\%$ ) is consistent with no overall survival benefit with albumin. After excluding studies at high risk of bias the relative risk point estimate becomes 0.91 but the conclusion does not change. Exploratory modelling with the addition of CRISTAL would move the z score close to the futility boundary whether studies at high risk of bias are included or excluded (graphs not shown).



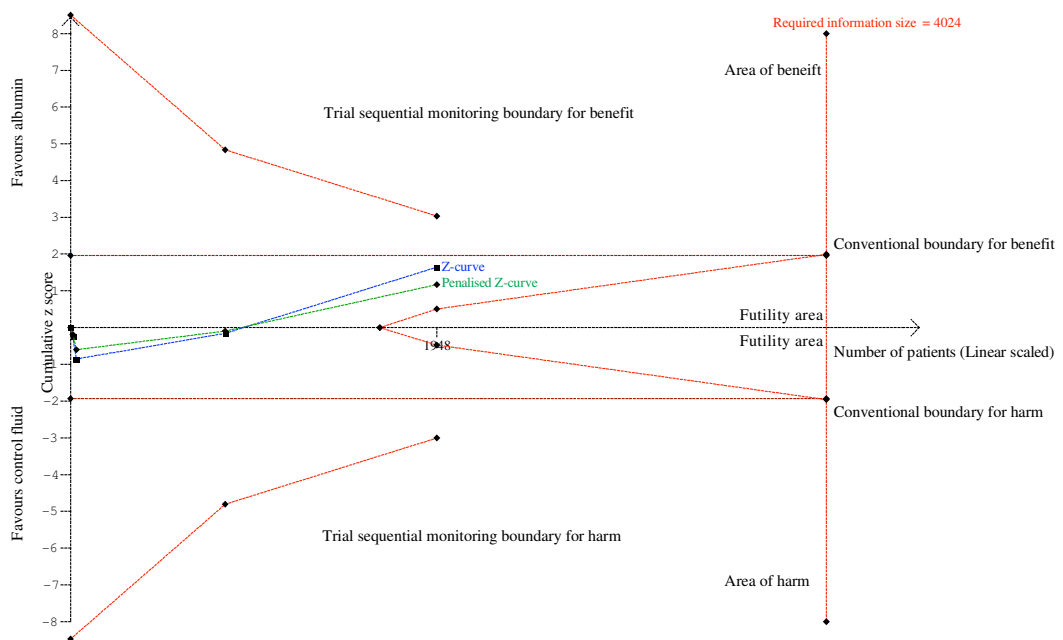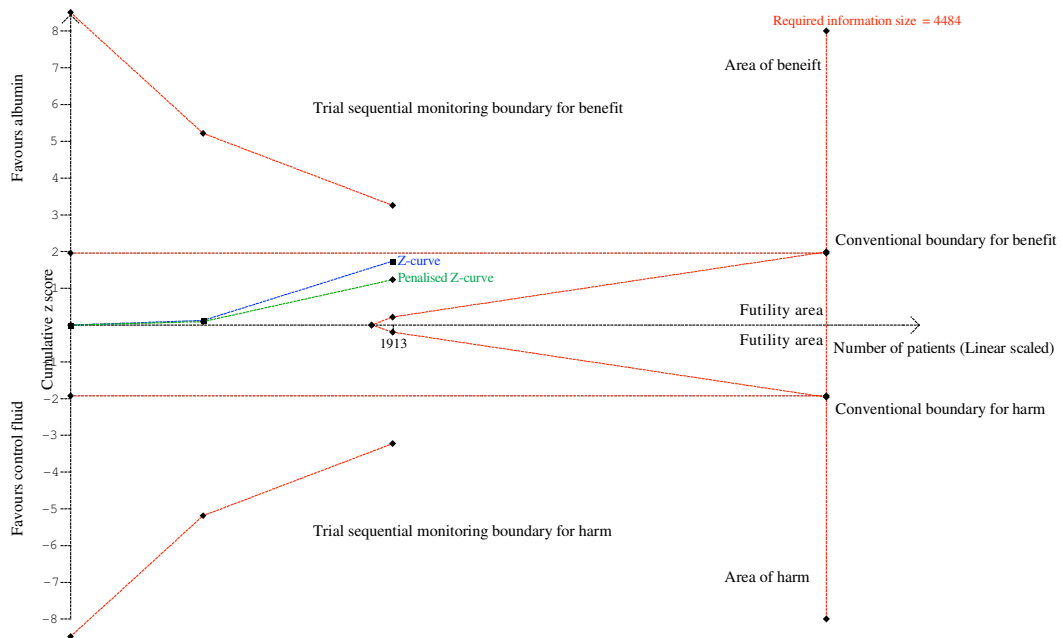

## 10. Forest plots and trial sequential analyses for the comparisons of human albumin compared to crystalloid fluid by sepsis subgroup, with or without exclusion of studies at high risk of bias

Forest plot of the relative risk of all-cause mortality in patients exposed to human albumin solutions compared to crystalloid fluids stratified by sepsis severity subgroup for all studies. Squares to the left of the line indicate that albumin reduced the risk of mortality; horizontal lines indicate 95% confidence intervals; square size represents relative study weight; the diamond indicates the aggregated random effects relative risk (95% confidence interval; M-H (Mantel-Haenszel). Data from ALBIOS[1] were separated into severe sepsis and septic shock subgroups as 90 day mortality outcome data were available. Studies are ordered chronologically within subgroups.

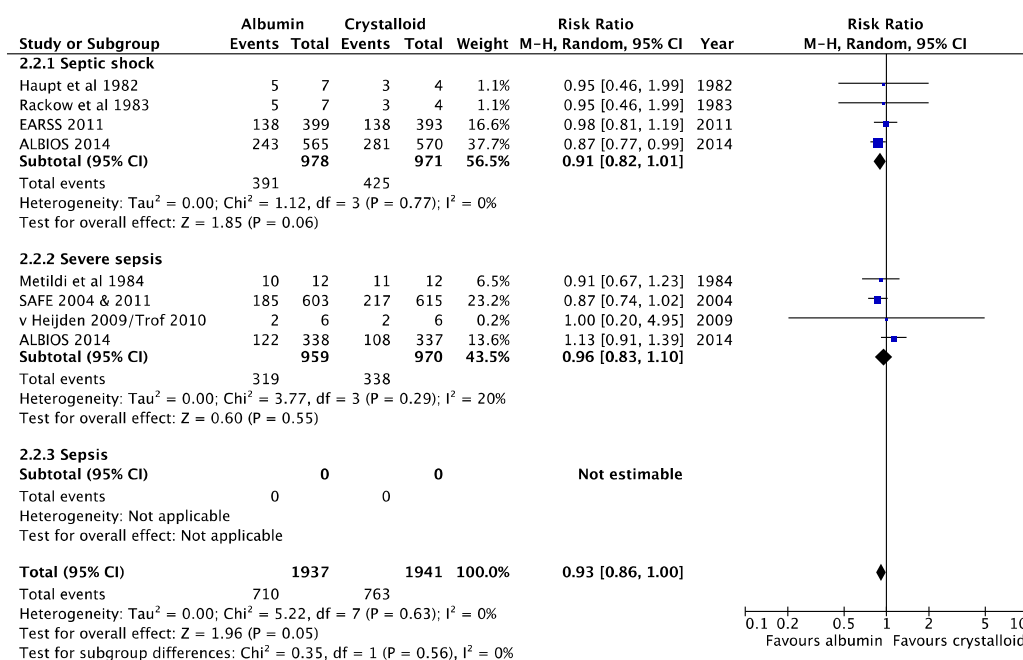

Forest plot of the relative risk of all-cause mortality in patients exposed to human albumin solutions compared to crystalloid fluid, stratified by sepsis severity subgroup after exclusion of studies at high risk of bias. Squares to the left of the line indicate that albumin reduced the risk of mortality; horizontal lines indicate 95% confidence intervals; square size represents relative study weight; the diamond indicates the aggregated random effects relative risk (95% confidence interval; M-H (Mantel-Haenszel). Data from ALBIOS[1] were separated into severe sepsis and septic shock subgroups as 90 day mortality outcome data were available. Studies are ordered chronologically within subgroups.

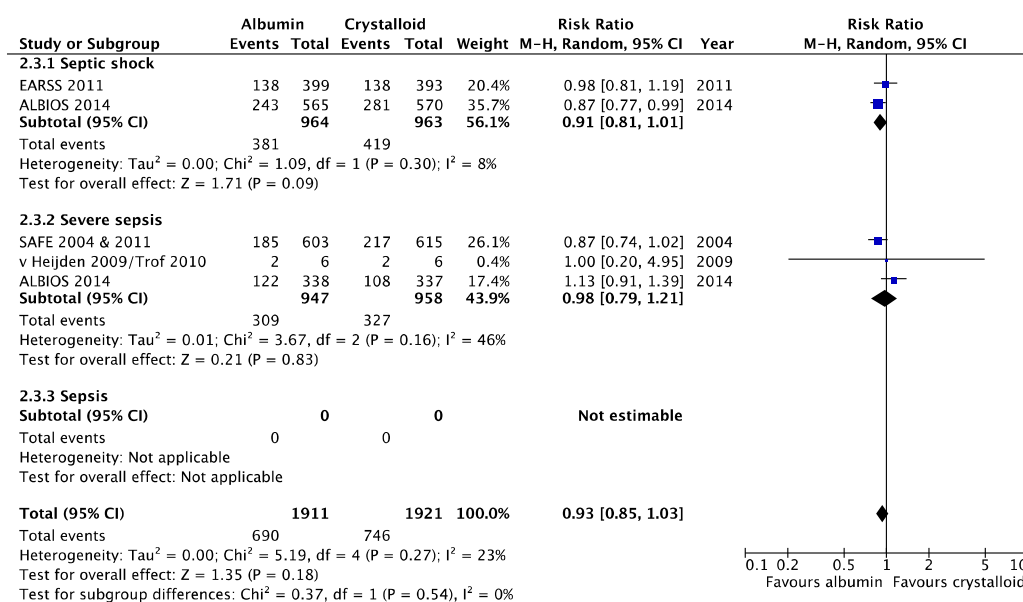

The graphs show trial sequential analysis of studies reporting all-cause mortality comparing pooled human albumin solutions to crystalloid fluids. The upper graph included all studies and the lower graph had excluded studies at high risk of bias. A diversity adjusted information size was calculated for both models using  $\alpha=0.05$  (two sided),  $\beta=0.20$  (power 80%), an anticipated relative risk of 10.0%, and an event proportion of 38.8% in the control arm. The blue cumulative z curve was constructed using a random effects model, and the green curve represents an adjusted z curve. When all studies are included the relative risk is 0.93 and  $P=0.05$ . The trial sequential analysis corrected 95% confidence interval (0.84 to 1.01;  $D^2=0\%$ ) is consistent with no survival benefit, although this possibility cannot be completely excluded. After excluding studies at high risk of bias the relative risk point estimate remains 0.93 and  $P=0.18$ . The trial sequential analysis corrected 95% confidence interval (0.81 to 1.08;  $D^2=0\%$ ) is still consistent with no reduction in mortality. There does not seem to be robust evidence of albumin benefit after correction for repetitive testing and sparse data.

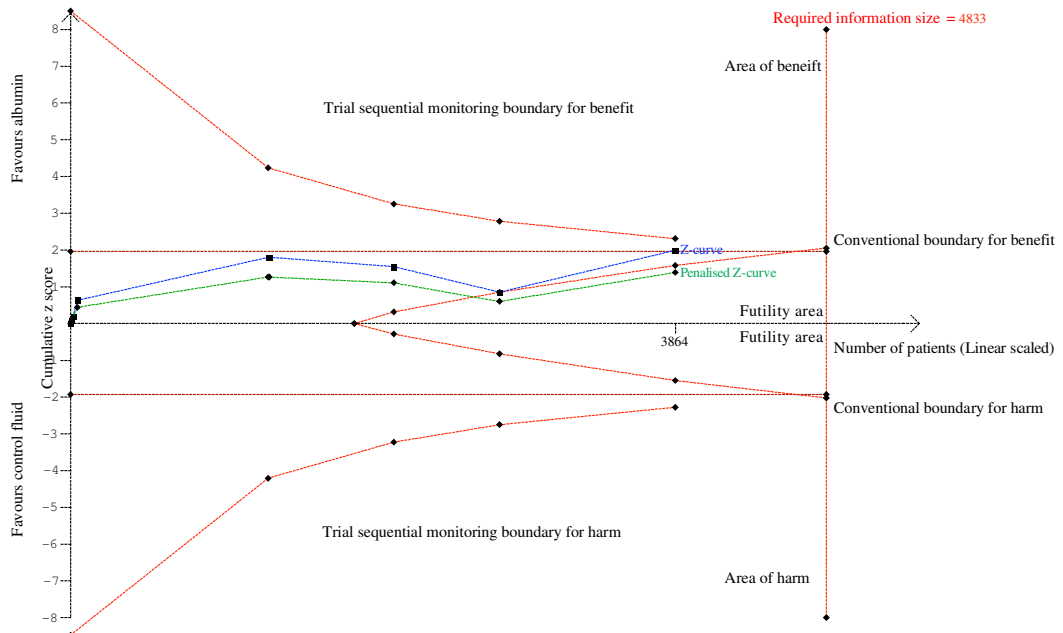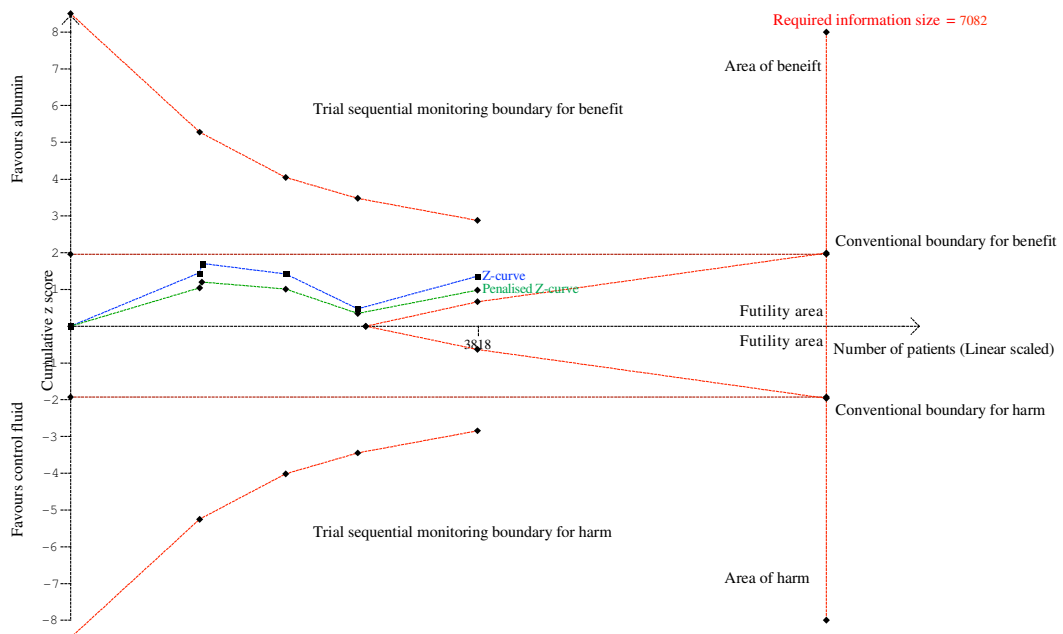

The graphs show trial sequential analysis of studies reporting all-cause mortality comparing pooled human albumin solutions to crystalloid fluids in patients with septic shock where mortality outcome data were available. The upper graph included all studies, and the lower graph had excluded studies at high risk of bias. A diversity adjusted information size was calculated for both models using  $\alpha=0.05$  (two sided),  $\beta=0.20$  (power 80%), an anticipated relative risk of 10.0%, and an event proportion of 43.5% in the control arm. The blue cumulative z curve was constructed using a random effects model, and the green curve represents an adjusted z curve. When all studies are included the relative risk is 0.91 and  $P=0.06$ . The trial sequential analysis corrected 95% confidence interval (0.77 to 1.06;  $D^2=0\%$ ) is consistent with no overall survival benefit with albumin. After excluding studies at high risk of bias the relative risk point estimate remained 0.91 and  $P=0.08$ . The conclusion did not change. Exploratory modelling with the addition of CRISTAL would move the z score close to the futility boundary whether studies at high risk of bias are included or excluded (graphs not shown).

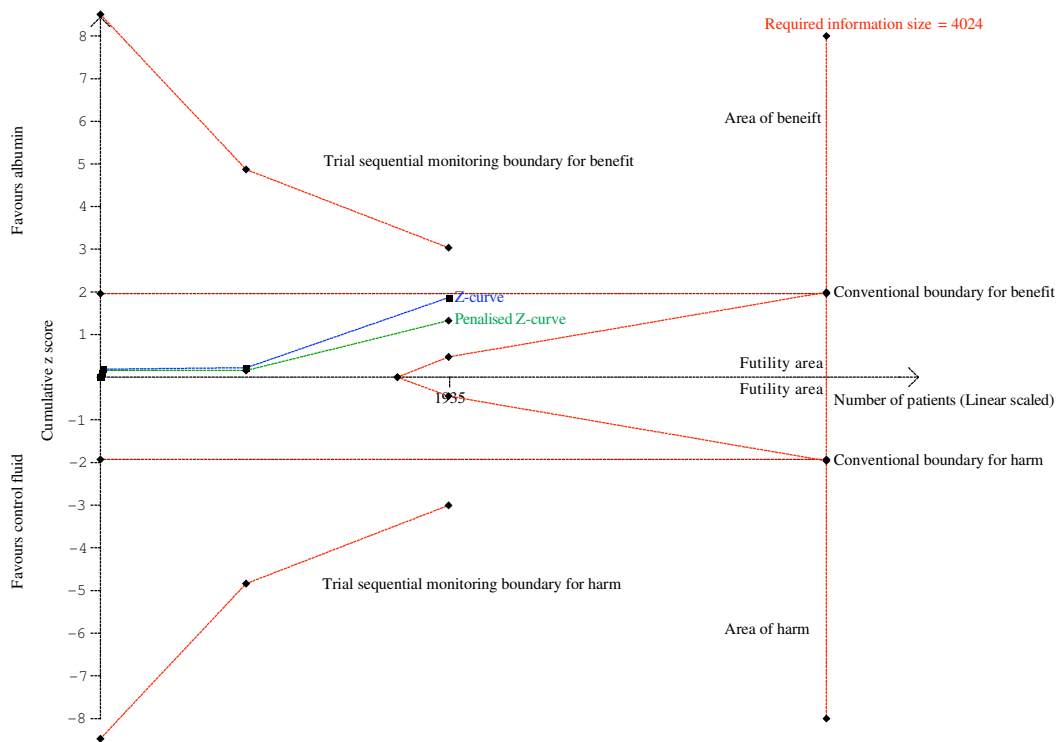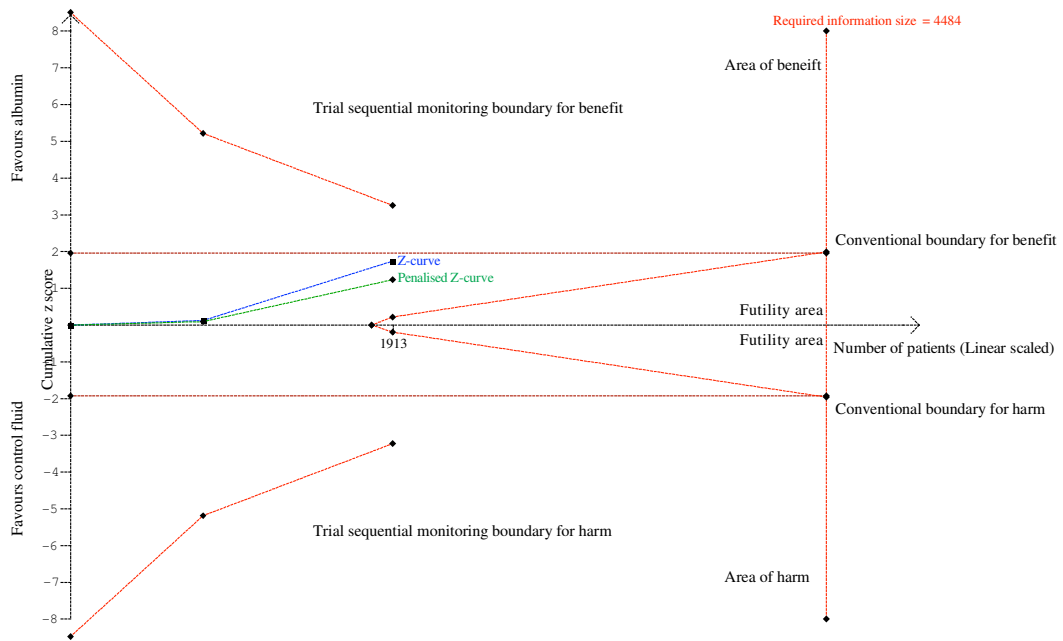

## 11. Forest plots of human albumin compared to colloid fluid by sepsis subgroup, with or without exclusion of studies at high risk of bias

Forest plot of the relative risk of all-cause mortality in patients exposed to human albumin solutions compared to colloid fluid stratified by sepsis severity subgroup. Squares to the left of the line indicate that albumin reduced the risk of mortality; horizontal lines indicate 95% confidence intervals; square size represents relative study weight; the diamond indicates the aggregated random effects relative risk (95% confidence interval; M-H (Mantel-Haenszel)). Studies are ordered chronologically within subgroups.

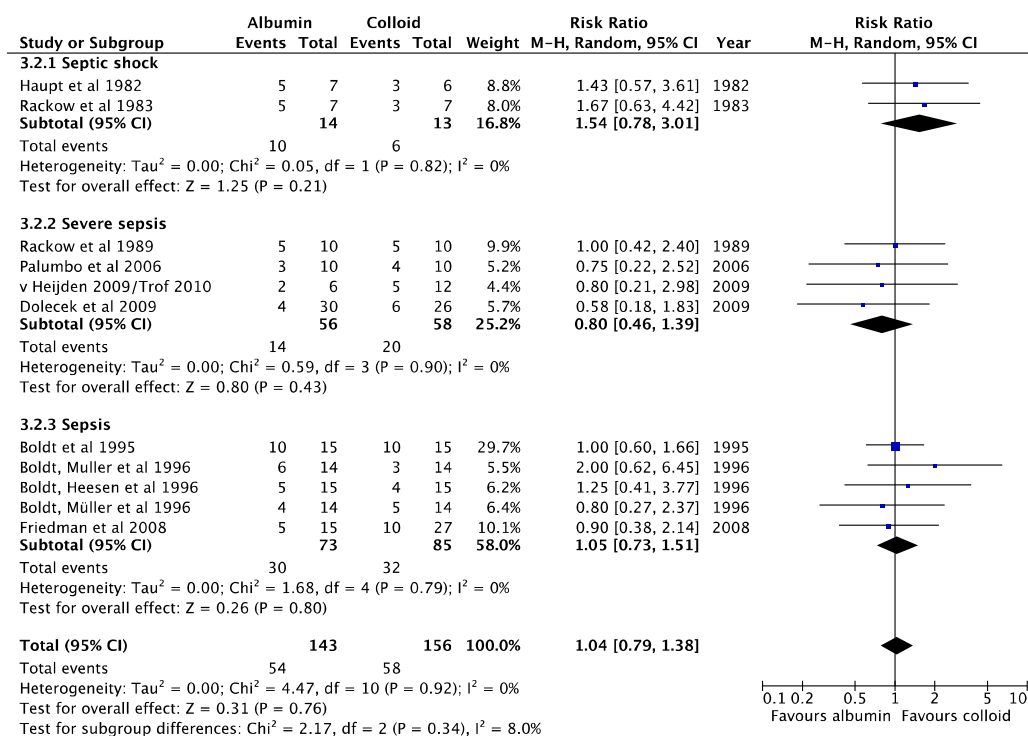



Forest plot of the relative risk of all-cause mortality in patients exposed to human albumin solutions compared to colloid fluid stratified by sepsis severity subgroup after exclusion of studies at high risk of bias. Squares to the left of the line indicate that albumin reduced the risk of mortality; horizontal lines indicate 95% confidence intervals; square size represents relative study weight; the diamond indicates the aggregated random effects relative risk (95% confidence interval; M-H (Mantel-Haenszel). Studies are ordered chronologically within subgroups.

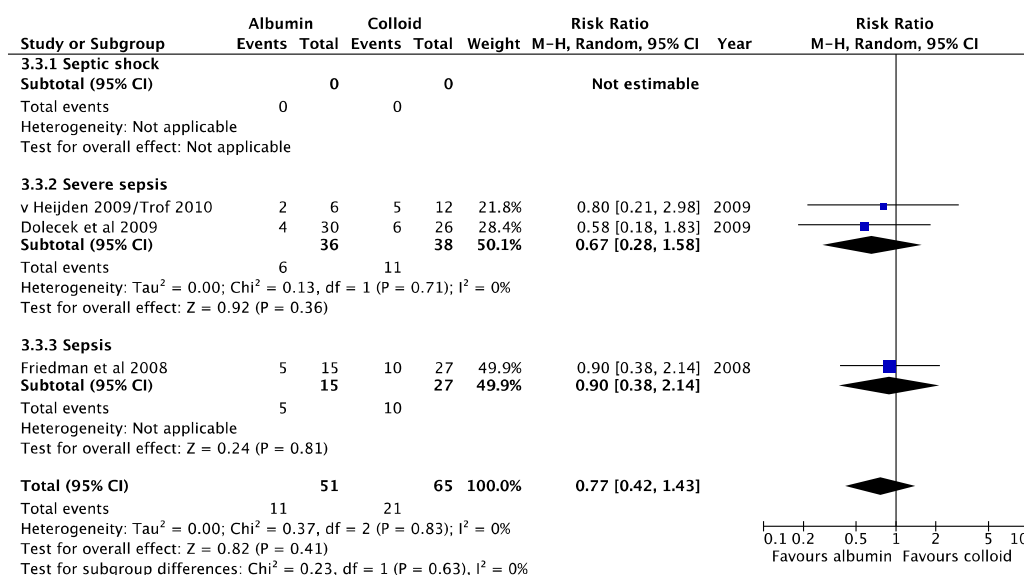

## References

1. Caironi P, Tognoni G, Masson S, et al. Albumin Replacement in Patients with Severe Sepsis or Septic Shock. *The New England journal of medicine* 2014;**370**(15):1412-21 doi:  
DOI: 10.1056/NEJMoa1305727[published Online First: Epub Date]].
2. Boldt J, Heesen M, Welters I, et al. Does the type of volume therapy influence endothelial-related coagulation in the critically ill? *British journal of anaesthesia* 1995;**75**(6):740-6
3. Boldt J, Heesen M, Muller M, et al. The effects of albumin versus hydroxyethyl starch solution on cardiorespiratory and circulatory variables in critically ill patients. *Anesthesia and analgesia* 1996;**83**(2):254-61
4. Boldt J, Müller M, Heesen M, et al. Influence of different volume therapies on platelet function in the critically ill. *Intensive care medicine* 1996;**22**(10):1075-81
5. Boldt J, Muller M, Heesen M, et al. Influence of different volume therapies and pentoxifylline infusion on circulating soluble adhesion molecules in critically ill patients. *Critical care medicine* 1996;**24**(3):385-91
6. Dolecek M, Svoboda P, Kantorova I, et al. Therapeutic influence of 20 % albumin versus 6% hydroxyethylstarch on extravascular lung water in septic patients: a randomized controlled trial. *Hepato-gastroenterology* 2009;**56**(96):1622-8
7. Charpentier J, Mira JP, Group ES. Efficacy and tolerance of hyperoncotic albumin administration in septic shock patients: the EARSS study. *Intensive care*

- medicine 2011;**37**(Supplement 1):S115 doi: 10.1007/s00134-011-2322-1[published Online First: Epub Date].
8. Friedman G, Jankowski S, Shahla M, et al. Hemodynamic effects of 6% and 10% hydroxyethyl starch solutions versus 4% albumin solution in septic patients. *Journal of clinical anesthesia* 2008;**20**(7):528-33 doi: 10.1016/j.jclinane.2008.05.022[published Online First: Epub Date].
9. Haupt MT, Rackow EC. Colloid osmotic pressure and fluid resuscitation with hetastarch, albumin, and saline solutions. *Critical care medicine* 1982;**10**(3):159-62
10. Metildi LA, Shackford SR, Virgilio RW, et al. Crystalloid versus colloid in fluid resuscitation of patients with severe pulmonary insufficiency. *Surgery, gynecology & obstetrics* 1984;**158**(3):207-12
11. Palumbo D, Servillo G, D'Amato L, et al. The effects of hydroxyethyl starch solution in critically ill patients. *Minerva anesthesiologica* 2006;**72**(7-8):655-64
12. Rackow EC, Falk JL, Fein IA, et al. Fluid resuscitation in circulatory shock: a comparison of the cardiorespiratory effects of albumin, hetastarch, and saline solutions in patients with hypovolemic and septic shock. *Critical care medicine* 1983;**11**(11):839-50
13. Rackow EC, Mecher C, Astiz ME, et al. Effects of pentastarch and albumin infusion on cardiorespiratory function and coagulation in patients with severe sepsis and systemic hypoperfusion. *Critical care medicine* 1989;**17**(5):394-8
14. Finfer S, Bellomo R, Boyce N, et al. A comparison of albumin and saline for fluid resuscitation in the intensive care unit. *The New England journal of medicine* 2004;**350**(22):2247-56 doi: 10.1056/NEJMoa040232[published Online First: Epub Date].

15. Finfer S, McEvoy S, Bellomo R, et al. Impact of albumin compared to saline on organ function and mortality of patients with severe sepsis. *Intensive care medicine* 2011;**37**(1):86-96 doi: 10.1007/s00134-010-2039-6[published Online First: Epub Date]].
16. van der Heijden M, Verheij J, van Nieuw Amerongen GP, et al. Crystalloid or colloid fluid loading and pulmonary permeability, edema, and injury in septic and nonseptic critically ill patients with hypovolemia. *Critical care medicine* 2009;**37**(4):1275-81 doi: 10.1097/CCM.0b013e31819cedfd[published Online First: Epub Date]].
17. Trof RJ, Sukul SP, Twisk JW, et al. Greater cardiac response of colloid than saline fluid loading in septic and non-septic critically ill patients with clinical hypovolaemia. *Intensive care medicine* 2010;**36**(4):697-701 doi: 10.1007/s00134-010-1776-x[published Online First: Epub Date]].
18. Veneman TF, Oude Nijhuis J, Woittiez AJ. Human albumin and starch administration in critically ill patients: a prospective randomized clinical trial. *Wiener klinische Wochenschrift* 2004;**116**(9-10):305-9
19. Dellinger RP, Carlet JM, Masur H, et al. Surviving Sepsis Campaign guidelines for management of severe sepsis and septic shock. *Critical care medicine* 2004;**32**(3):858-73
20. Dellinger RP, Carlet JM, Masur H, et al. Surviving Sepsis Campaign guidelines for management of severe sepsis and septic shock. *Intensive care medicine* 2004;**30**(4):536-55 doi: 10.1007/s00134-004-2210-z[published Online First: Epub Date]].
21. Almeida A, Martin G, Hajjar L. Lactated Ringer Versus Albumin in Early Sepsis Therapy (RASP). 2013:<http://clinicaltrials.gov/ct2/show/NCT01337934>

22. Annane D, Siami S, Jaber S, et al. Effects of fluid resuscitation with colloids vs crystalloids on mortality in critically ill patients presenting with hypovolemic shock: the CRISTAL randomized trial. *JAMA : the journal of the American Medical Association* 2013;**310**(17):1809-17 doi: 10.1001/jama.2013.280502[published Online First: Epub Date].
